# Supplementary material
Source: MDPI journal article supplement (https://www.mdpi.com/2073-431X/10/5/58)
Supplement: s1 [file s1]

```

* Chart Builder.
GGRAPH
  /GRAPHDATASET NAME="graphdataset" VARIABLES=method median_mm MISSING=LISTWIS
E REPORTMISSING=NO
  /GRAPHSPEC SOURCE=INLINE.
BEGIN GPL
  SOURCE: s=userSource(id("graphdataset"))
  DATA: method=col(source(s), name("method"), unit.category())
  DATA: median_mm=col(source(s), name("median_mm"))
  DATA: id=col(source(s), name("$CASENUM"), unit.category())
  GUIDE: axis(dim(1), label("method"))
  GUIDE: axis(dim(2), label("median_mm"))
  GUIDE: text.title(label("Simple Boxplot of median_mm by method"))
  SCALE: linear(dim(2), include(0))
  ELEMENT: schema(position(bin.quantile.letter(method*median_mm)), label(id))
END GPL.

```

## GGraph

### Notes

|                |                                   |                                                                                        |
|----------------|-----------------------------------|----------------------------------------------------------------------------------------|
| Output Created |                                   | 29-MAR-2021 16:12:20                                                                   |
| Comments       |                                   |                                                                                        |
| Input          | Data                              | C:<br>\Data\SubmittedPapers\De<br>nnisPaper\Supplementary<br>Material\Main\medians.sav |
|                | Active Dataset                    | DataSet1                                                                               |
|                | Filter                            | <none>                                                                                 |
|                | Weight                            | <none>                                                                                 |
|                | Split File                        | <none>                                                                                 |
|                | N of Rows in Working Data<br>File | 100                                                                                    |

## Notes

|           |                                                                                                                                                                                                                                                                                                                                                                                                                                                                                                                                                                                                                                                                                                                                                                                      |             |
|-----------|--------------------------------------------------------------------------------------------------------------------------------------------------------------------------------------------------------------------------------------------------------------------------------------------------------------------------------------------------------------------------------------------------------------------------------------------------------------------------------------------------------------------------------------------------------------------------------------------------------------------------------------------------------------------------------------------------------------------------------------------------------------------------------------|-------------|
| Syntax    | <pre> GGRAPH   /GRAPHDATASET   NAME="graphdataset"   VARIABLES=method   median_mm   MISSING=LISTWISE   REPORTMISSING=NO   /GRAPHSPEC   SOURCE=INLINE.   BEGIN GPL     SOURCE: s=userSource     (id("graphdataset"))     DATA: method=col     (source(s), name     ("method"), unit.     category())     DATA: median_mm=col     (source(s), name     ("median_mm"))     DATA: id=col(source(s),     name("\$CASENUM"), unit.     category())     GUIDE: axis(dim(1), label     ("method"))     GUIDE: axis(dim(2), label     ("median_mm"))     GUIDE: text.title(label     ("Simple Boxplot of     median_mm by method"))     SCALE: linear(dim(2),     include(0))     ELEMENT: schema     (position(bin.quantile.letter     (method*median_mm)),     label(id))   END GPL. </pre> |             |
| Resources | Processor Time                                                                                                                                                                                                                                                                                                                                                                                                                                                                                                                                                                                                                                                                                                                                                                       | 00:00:02,72 |
|           | Elapsed Time                                                                                                                                                                                                                                                                                                                                                                                                                                                                                                                                                                                                                                                                                                                                                                         | 00:00:01,08 |

[DataSet1] C:\Data\SubmittedPapers\DennisPaper\SupplementaryMaterial\Main\medi  
ans.sav

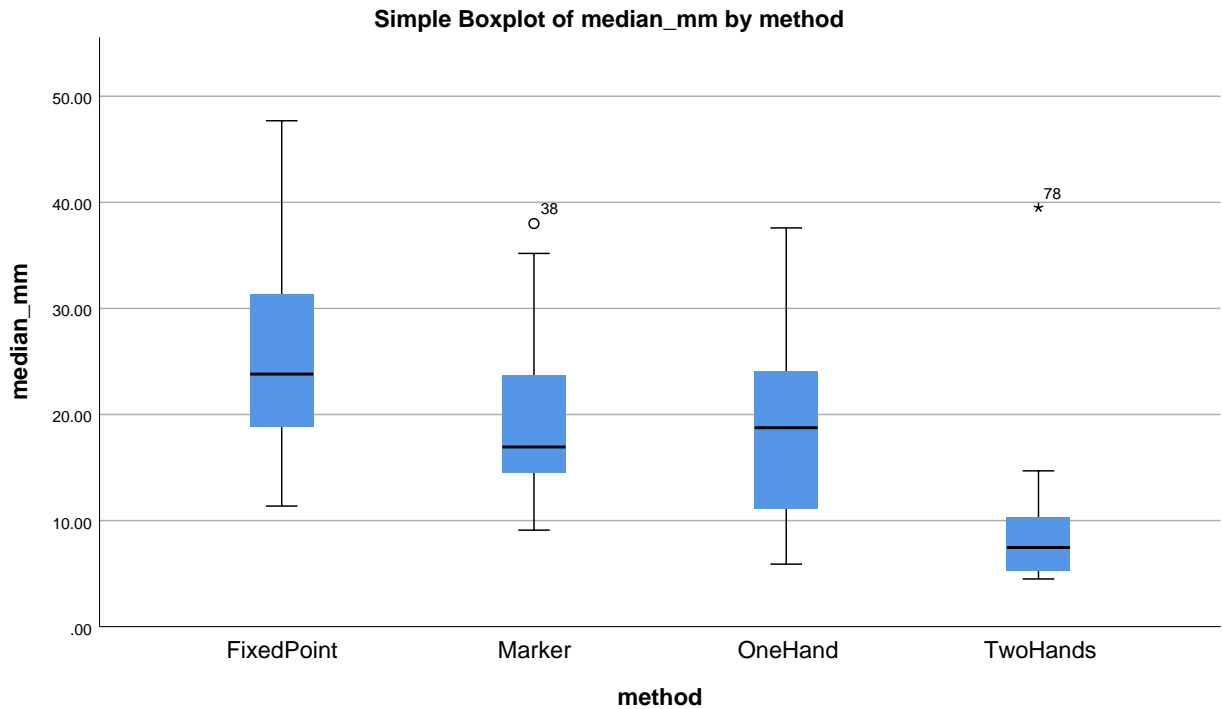

DATASET ACTIVATE DataSet1.

SAVE OUTFILE='C:\Data\SubmittedPaper\DennisPaper\SupplementaryMaterial\Main\medians.sav'

/COMPRESSED.

EXAMINE VARIABLES=median\_mm BY method

/PLOT BOXPLOT STEMLEAF NPLOT

/COMPARE GROUPS

/STATISTICS DESCRIPTIVES

/CINTERVAL 95

/MISSING LISTWISE

/NOTOTAL.

## Explore

## Notes

|                        |                                |                                                                                                                                                                                    |
|------------------------|--------------------------------|------------------------------------------------------------------------------------------------------------------------------------------------------------------------------------|
| Output Created         |                                | 29-MAR-2021 16:14:33                                                                                                                                                               |
| Comments               |                                |                                                                                                                                                                                    |
| Input                  | Data                           | C:<br>\Data\SubmittedPapers\De<br>nnisPaper\Supplementary<br>Material\Main\medians.sav                                                                                             |
|                        | Active Dataset                 | DataSet1                                                                                                                                                                           |
|                        | Filter                         | <none>                                                                                                                                                                             |
|                        | Weight                         | <none>                                                                                                                                                                             |
|                        | Split File                     | <none>                                                                                                                                                                             |
|                        | N of Rows in Working Data File | 100                                                                                                                                                                                |
| Missing Value Handling | Definition of Missing          | User-defined missing values for dependent variables are treated as missing.                                                                                                        |
|                        | Cases Used                     | Statistics are based on cases with no missing values for any dependent variable or factor used.                                                                                    |
| Syntax                 |                                | EXAMINE<br>VARIABLES=median_mm<br>BY method<br>/PLOT BOXPLOT<br>STEMLEAF NPLOT<br>/COMPARE GROUPS<br>/STATISTICS<br>DESCRIPTIVES<br>/INTERVAL 95<br>/MISSING LISTWISE<br>/NOTOTAL. |
| Resources              | Processor Time                 | 00:00:03,70                                                                                                                                                                        |
|                        | Elapsed Time                   | 00:00:01,46                                                                                                                                                                        |

## Median\_mm by method

## Case Processing Summary

|           |        | Valid |         | Cases Missing |         | Total |         |
|-----------|--------|-------|---------|---------------|---------|-------|---------|
|           | method | N     | Percent | N             | Percent | N     | Percent |
| median_mm | 1      | 25    | 100.0%  | 0             | 0.0%    | 25    | 100.0%  |
|           | 2      | 24    | 96.0%   | 1             | 4.0%    | 25    | 100.0%  |
|           | 3      | 25    | 100.0%  | 0             | 0.0%    | 25    | 100.0%  |
|           | 4      | 24    | 96.0%   | 1             | 4.0%    | 25    | 100.0%  |

## Descriptives

| method    |   |                                  | Statistic   | Std. Error |
|-----------|---|----------------------------------|-------------|------------|
| median_mm | 1 | Mean                             | 26.5337     | 2.07386    |
|           |   | 95% Confidence Interval for Mean | Lower Bound | 22.2535    |
|           |   |                                  | Upper Bound | 30.8139    |
|           |   | 5% Trimmed Mean                  | 26.1776     |            |
|           |   | Median                           | 23.8108     |            |
|           |   | Variance                         | 107.522     |            |
|           |   | Std. Deviation                   | 10.36930    |            |
|           |   | Minimum                          | 11.37       |            |
|           |   | Maximum                          | 47.69       |            |
|           |   | Range                            | 36.32       |            |
|           |   | Interquartile Range              | 14.38       |            |
|           |   | Skewness                         | .687        | .464       |
|           |   | Kurtosis                         | -.600       | .902       |
|           | 2 | Mean                             | 18.9258     | 1.38868    |
|           |   | 95% Confidence Interval for Mean | Lower Bound | 16.0531    |
|           |   |                                  | Upper Bound | 21.7985    |
|           |   | 5% Trimmed Mean                  | 18.5860     |            |
|           |   | Median                           | 16.6941     |            |
|           |   | Variance                         | 46.282      |            |
|           |   | Std. Deviation                   | 6.80310     |            |
|           |   | Minimum                          | 9.10        |            |
|           |   | Maximum                          | 35.19       |            |
|           |   | Range                            | 26.09       |            |
|           |   | Interquartile Range              | 9.43        |            |
|           |   | Skewness                         | .862        | .472       |
|           |   | Kurtosis                         | .249        | .918       |

## Descriptives

| method |                                  | Statistic   | Std. Error |
|--------|----------------------------------|-------------|------------|
| 3      | Mean                             | 18.1235     | 1.71243    |
|        | 95% Confidence Interval for Mean | Lower Bound | 14.5893    |
|        |                                  | Upper Bound | 21.6578    |
|        | 5% Trimmed Mean                  | 17.7715     |            |
|        | Median                           | 18.7530     |            |
|        | Variance                         | 73.310      |            |
|        | Std. Deviation                   | 8.56213     |            |
|        | Minimum                          | 5.90        |            |
|        | Maximum                          | 37.59       |            |
|        | Range                            | 31.69       |            |
|        | Interquartile Range              | 13.83       |            |
|        | Skewness                         | .361        | .464       |
|        | Kurtosis                         | -.508       | .902       |
| 4      | Mean                             | 8.0931      | .61774     |
|        | 95% Confidence Interval for Mean | Lower Bound | 6.8152     |
|        |                                  | Upper Bound | 9.3710     |
|        | 5% Trimmed Mean                  | 7.9421      |            |
|        | Median                           | 7.2043      |            |
|        | Variance                         | 9.158       |            |
|        | Std. Deviation                   | 3.02628     |            |
|        | Minimum                          | 4.50        |            |
|        | Maximum                          | 14.69       |            |
|        | Range                            | 10.19       |            |
|        | Interquartile Range              | 4.96        |            |
|        | Skewness                         | .576        | .472       |
|        | Kurtosis                         | -.762       | .918       |

## Tests of Normality

|           |   | Kolmogorov-Smirnov <sup>a</sup> |    |      | Shapiro-Wilk |    |      |
|-----------|---|---------------------------------|----|------|--------------|----|------|
| method    |   | Statistic                       | df | Sig. | Statistic    | df | Sig. |
| median_mm | 1 | .148                            | 25 | .162 | .921         | 25 | .055 |
|           | 2 | .157                            | 24 | .132 | .931         | 24 | .102 |
|           | 3 | .148                            | 25 | .168 | .948         | 25 | .221 |
|           | 4 | .147                            | 24 | .191 | .922         | 24 | .066 |

a. Lilliefors Significance Correction

```

ONEWAY median_mm BY method
  /STATISTICS DESCRIPTIVES HOMOGENEITY WELCH
  /MISSING ANALYSIS
  /POSTHOC=GH ALPHA(0.05) .

```

## Oneway

### Notes

|                        |                                |                                                                                                                                     |
|------------------------|--------------------------------|-------------------------------------------------------------------------------------------------------------------------------------|
| Output Created         |                                | 29-MAR-2021 16:16:17                                                                                                                |
| Comments               |                                |                                                                                                                                     |
| Input                  | Data                           | C:<br>\Data\SubmittedPapers\De<br>nnisPaper\Supplementary<br>Material\Main\medians.sav                                              |
|                        | Active Dataset                 | DataSet1                                                                                                                            |
|                        | Filter                         | <none>                                                                                                                              |
|                        | Weight                         | <none>                                                                                                                              |
|                        | Split File                     | <none>                                                                                                                              |
|                        | N of Rows in Working Data File | 100                                                                                                                                 |
| Missing Value Handling | Definition of Missing          | User-defined missing values are treated as missing.                                                                                 |
|                        | Cases Used                     | Statistics for each analysis are based on cases with no missing data for any variable in the analysis.                              |
| Syntax                 |                                | ONEWAY median_mm BY method<br>/STATISTICS<br>DESCRIPTIVES<br>HOMOGENEITY WELCH<br>/MISSING ANALYSIS<br>/POSTHOC=GH ALPHA<br>(0.05). |
| Resources              | Processor Time                 | 00:00:00,05                                                                                                                         |
|                        | Elapsed Time                   | 00:00:00,06                                                                                                                         |

## Descriptives

median\_mm

|       | N  | Mean    | Std. Deviation | Std. Error | 95% Confidence Interval for Mean |             | Minimum |
|-------|----|---------|----------------|------------|----------------------------------|-------------|---------|
|       |    |         |                |            | Lower Bound                      | Upper Bound |         |
| 1     | 25 | 26.5337 | 10.36930       | 2.07386    | 22.2535                          | 30.8139     | 11.37   |
| 2     | 24 | 18.9258 | 6.80310        | 1.38868    | 16.0531                          | 21.7985     | 9.10    |
| 3     | 25 | 18.1235 | 8.56213        | 1.71243    | 14.5893                          | 21.6578     | 5.90    |
| 4     | 24 | 8.0931  | 3.02628        | .61774     | 6.8152                           | 9.3710      | 4.50    |
| Total | 98 | 18.0090 | 10.05766       | 1.01598    | 15.9926                          | 20.0254     | 4.50    |

## Descriptives

median\_mm

|       | Maximum |
|-------|---------|
| 1     | 47.69   |
| 2     | 35.19   |
| 3     | 37.59   |
| 4     | 14.69   |
| Total | 47.69   |

## Test of Homogeneity of Variances

|           |                                      | Levene Statistic | df1 | df2    | Sig. |
|-----------|--------------------------------------|------------------|-----|--------|------|
| median_mm | Based on Mean                        | 9.650            | 3   | 94     | .000 |
|           | Based on Median                      | 6.815            | 3   | 94     | .000 |
|           | Based on Median and with adjusted df | 6.815            | 3   | 68.029 | .000 |
|           | Based on trimmed mean                | 9.486            | 3   | 94     | .000 |

## ANOVA

median\_mm

|                | Sum of Squares | df | Mean Square | F      | Sig. |
|----------------|----------------|----|-------------|--------|------|
| Between Groups | 4197.077       | 3  | 1399.026    | 23.420 | .000 |
| Within Groups  | 5615.111       | 94 | 59.735      |        |      |
| Total          | 9812.189       | 97 |             |        |      |



## Robust Tests of Equality of Means

median\_mm

|       | Statistic <sup>a</sup> | df1 | df2    | Sig. |
|-------|------------------------|-----|--------|------|
| Welch | 40.965                 | 3   | 46.765 | .000 |

a. Asymptotically F distributed.

## Post Hoc Tests

### Multiple Comparisons

Dependent Variable: median\_mm

Games-Howell

| (I) method | (J) method | Mean<br>Difference (I-J) | Std. Error | Sig. | 95% Confidence Interval |             |
|------------|------------|--------------------------|------------|------|-------------------------|-------------|
|            |            |                          |            |      | Lower Bound             | Upper Bound |
| 1          | 2          | 7.60789 <sup>*</sup>     | 2.49586    | .020 | .9291                   | 14.2867     |
|            | 3          | 8.41017 <sup>*</sup>     | 2.68948    | .016 | 1.2433                  | 15.5770     |
|            | 4          | 18.44063 <sup>*</sup>    | 2.16391    | .000 | 12.5353                 | 24.3460     |
| 2          | 1          | -7.60789 <sup>*</sup>    | 2.49586    | .020 | -14.2867                | -.9291      |
|            | 3          | .80227                   | 2.20473    | .983 | -5.0771                 | 6.6817      |
|            | 4          | 10.83273 <sup>*</sup>    | 1.51988    | .000 | 6.7132                  | 14.9523     |
| 3          | 1          | -8.41017 <sup>*</sup>    | 2.68948    | .016 | -15.5770                | -1.2433     |
|            | 2          | -.80227                  | 2.20473    | .983 | -6.6817                 | 5.0771      |
|            | 4          | 10.03046 <sup>*</sup>    | 1.82044    | .000 | 5.0816                  | 14.9793     |
| 4          | 1          | -18.44063 <sup>*</sup>   | 2.16391    | .000 | -24.3460                | -12.5353    |
|            | 2          | -10.83273 <sup>*</sup>   | 1.51988    | .000 | -14.9523                | -6.7132     |
|            | 3          | -10.03046 <sup>*</sup>   | 1.82044    | .000 | -14.9793                | -5.0816     |

\*. The mean difference is significant at the 0.05 level.

## Notes

|                |                                   |                                                                                        |
|----------------|-----------------------------------|----------------------------------------------------------------------------------------|
| Output Created |                                   | 29-MAR-2021 16:17:32                                                                   |
| Comments       |                                   |                                                                                        |
| Input          | Data                              | C:<br>\Data\SubmittedPapers\De<br>nnisPaper\Supplementary<br>Material\Main\medians.sav |
|                | Active Dataset                    | DataSet1                                                                               |
|                | Filter                            | <none>                                                                                 |
|                | Weight                            | <none>                                                                                 |
|                | Split File                        | <none>                                                                                 |
|                | N of Rows in Working Data<br>File | 100                                                                                    |

## Notes

### Syntax

```
GGRAPH
  /GRAPHDATASET
  NAME="graphdataset"
  VARIABLES=method
  MEANSE(median_mm, 2)
  [name="
  MEAN_median_mm"
  LOW="
  MEAN_median_mm_LOW
  " HIGH="
  MEAN_median_mm_HIG
  H"] MISSING=LISTWISE
  REPORTMISSING=NO
  /GRAPHSPEC
  SOURCE=INLINE.
  BEGIN GPL
    SOURCE: s=userSource
    (id("graphdataset"))
    DATA: method=col
    (source(s), name
    ("method"), unit.
    category())
    DATA:
    MEAN_median_mm=col
    (source(s), name
    ("MEAN_median_mm"))
    DATA: LOW=col(source
    (s), name
    ("MEAN_median_mm_LO
    W"))
    DATA: HIGH=col(source
    (s), name
    ("MEAN_median_mm_HI
    GH"))
    GUIDE: axis(dim(1), label
    ("method"))
    GUIDE: axis(dim(2), label
    ("Mean median_mm"))
    GUIDE: text.title(label
    ("Simple Bar Mean of
    median_mm by method"))
    GUIDE: text.footnote
    (label("Error Bars: 95%
    CI"))
    GUIDE: text.subfootnote
    (label("Error Bars: +/- 2
    SE"))
    SCALE: linear(dim(2),
    include(0))
    ELEMENT: interval
    (position
    (method*MEAN_median_
    mm), shape.interior
    (shape.square))
    ELEMENT: interval
    (position(region.spread.
    range(method*
    (LOW+HIGH))), shape.
    interior(shape.ibeam))
  END GPL.
```

### Notes

|           |                |             |
|-----------|----------------|-------------|
| Resources | Processor Time | 00:00:01,64 |
|           | Elapsed Time   | 00:00:00,66 |
