# Supplementary material
Source: MDPI journal article supplement (https://www.mdpi.com/2073-431X/10/5/58)
Supplement: s1 [file s1]

```

DATASET ACTIVATE DataSet1.
* Chart Builder.
GGRAPH
  /GRAPHDATASET NAME="graphdataset" VARIABLES=famenum error_mm seq_number MISS
ING=LISTWISE
  REPORTMISSING=NO
  /GRAPHSPEC SOURCE=INLINE.
BEGIN GPL
  SOURCE: s=userSource(id("graphdataset"))
  DATA: famenum=col(source(s), name("famenum"))
  DATA: error_mm=col(source(s), name("error_mm"))
  DATA: seq_number=col(source(s), name("seq_number"), unit.category())
  GUIDE: axis(dim(1), label("famenum"))
  GUIDE: axis(dim(2), label("error_mm"))
  GUIDE: legend(aesthetic(aesthetic.color.interior), label("seq_number"))
  GUIDE: text.title(label("Multiple Line of error_mm by famenum by seq_number"
))
  ELEMENT: line(position(famenum*error_mm), color.interior(seq_number), missin
g.wings())
END GPL.

```

## GGraph

## Notes

|                |                                   |                                                                          |
|----------------|-----------------------------------|--------------------------------------------------------------------------|
| Output Created |                                   | 29-MAR-2021 15:44:56                                                     |
| Comments       |                                   |                                                                          |
| Input          | Data                              | C:<br>\Data\SubmittedPapers\De<br>nnisPaper\PilotData\Fixed<br>Point.sav |
|                | Active Dataset                    | DataSet1                                                                 |
|                | Filter                            | <none>                                                                   |
|                | Weight                            | <none>                                                                   |
|                | Split File                        | <none>                                                                   |
|                | N of Rows in Working Data<br>File | 5000                                                                     |

## Notes

|           |                                                                                                                                                                                                                                                                                                                                                                                                                                                                                                                                                                                                                                                                                                                                                                                                                                                                      |             |
|-----------|----------------------------------------------------------------------------------------------------------------------------------------------------------------------------------------------------------------------------------------------------------------------------------------------------------------------------------------------------------------------------------------------------------------------------------------------------------------------------------------------------------------------------------------------------------------------------------------------------------------------------------------------------------------------------------------------------------------------------------------------------------------------------------------------------------------------------------------------------------------------|-------------|
| Syntax    | <pre> GGRAPH   /GRAPHDATASET   NAME="graphdataset"   VARIABLES=famenum   error_mm seq_number   MISSING=LISTWISE   REPORTMISSING=NO   /GRAPHSPEC   SOURCE=INLINE.   BEGIN GPL     SOURCE: s=userSource     (id("graphdataset"))     DATA: famenum=col     (source(s), name     ("famenum"))     DATA: error_mm=col     (source(s), name     ("error_mm"))     DATA: seq_number=col     (source(s), name     ("seq_number"), unit.     category())     GUIDE: axis(dim(1), label     ("famenum"))     GUIDE: axis(dim(2), label     ("error_mm"))     GUIDE: legend(aesthetic     (aesthetic.color.interior),     label("seq_number"))     GUIDE: text.title(label     ("Multiple Line of     error_mm by famenum by     seq_number"))     ELEMENT: line(position     (famenum*error_mm),     color.interior     (seq_number), missing.     wings())   END GPL. </pre> |             |
| Resources | Processor Time                                                                                                                                                                                                                                                                                                                                                                                                                                                                                                                                                                                                                                                                                                                                                                                                                                                       | 00:00:02,50 |
|           | Elapsed Time                                                                                                                                                                                                                                                                                                                                                                                                                                                                                                                                                                                                                                                                                                                                                                                                                                                         | 00:00:00,96 |

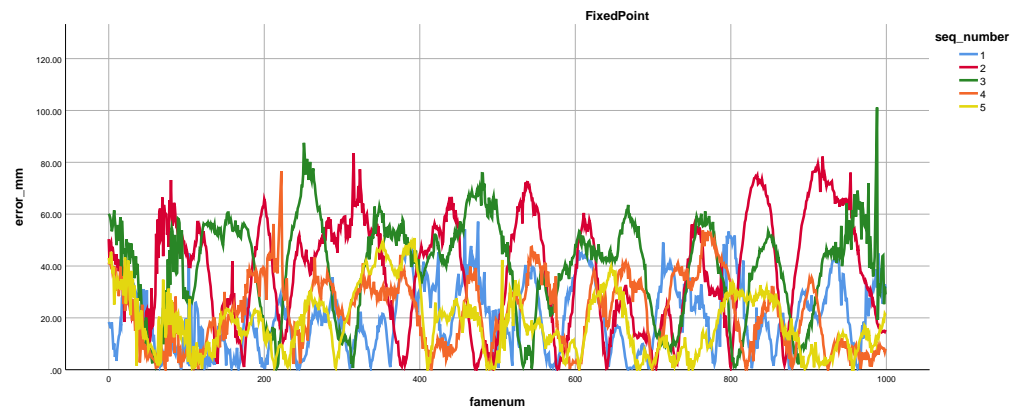

## Notes

|                |                                   |                                                                      |
|----------------|-----------------------------------|----------------------------------------------------------------------|
| Output Created |                                   | 29-MAR-2021 15:47:19                                                 |
| Comments       |                                   |                                                                      |
| Input          | Data                              | C:<br>\Data\SubmittedPapers\De<br>nnisPaper\PilotData\Marke<br>r.sav |
|                | Active Dataset                    | DataSet2                                                             |
|                | Filter                            | <none>                                                               |
|                | Weight                            | <none>                                                               |
|                | Split File                        | <none>                                                               |
|                | N of Rows in Working Data<br>File | 5000                                                                 |

## Notes

|                |                                                                                                                                                                                                                                                                                                                                                                                                                                                                                                                                                                                                                                                                                                                                                                                                                                                                                                                                           |                |             |              |             |
|----------------|-------------------------------------------------------------------------------------------------------------------------------------------------------------------------------------------------------------------------------------------------------------------------------------------------------------------------------------------------------------------------------------------------------------------------------------------------------------------------------------------------------------------------------------------------------------------------------------------------------------------------------------------------------------------------------------------------------------------------------------------------------------------------------------------------------------------------------------------------------------------------------------------------------------------------------------------|----------------|-------------|--------------|-------------|
| Syntax         | <pre> GGRAPH   /GRAPHDATASET   NAME="graphdataset"   VARIABLES=framenum   MEAN(error_mm)[name="   MEAN_error_mm"]   seq_number   MISSING=LISTWISE   REPORTMISSING=NO   /GRAPHSPEC   SOURCE=INLINE.   BEGIN GPL     SOURCE: s=userSource     (id("graphdataset"))     DATA: framenum=col     (source(s), name     ("framenum"))     DATA:     MEAN_error_mm=col     (source(s), name     ("MEAN_error_mm"))     DATA: seq_number=col     (source(s), name     ("seq_number"), unit.     category())     GUIDE: axis(dim(1), label     ("framenum"))     GUIDE: axis(dim(2), label     ("Mean error_mm"))     GUIDE: legend(aesthetic     (aesthetic.color.interior),     label("seq_number"))     GUIDE: text.title(label     ("Multiple Line Mean of     error_mm by framenum by     seq_number"))     ELEMENT: line(position     (framenum*MEAN_error_     mm), color.interior     (seq_number), missing.     wings())   END GPL. </pre> |                |             |              |             |
| Resources      | <table> <tr> <td>Processor Time</td> <td>00:00:01,77</td> </tr> <tr> <td>Elapsed Time</td> <td>00:00:00,54</td> </tr> </table>                                                                                                                                                                                                                                                                                                                                                                                                                                                                                                                                                                                                                                                                                                                                                                                                            | Processor Time | 00:00:01,77 | Elapsed Time | 00:00:00,54 |
| Processor Time | 00:00:01,77                                                                                                                                                                                                                                                                                                                                                                                                                                                                                                                                                                                                                                                                                                                                                                                                                                                                                                                               |                |             |              |             |
| Elapsed Time   | 00:00:00,54                                                                                                                                                                                                                                                                                                                                                                                                                                                                                                                                                                                                                                                                                                                                                                                                                                                                                                                               |                |             |              |             |

\* Chart Builder.

GGRAPH

```
/GRAPHDATASET NAME="graphdataset" VARIABLES=framenum error_mm seq_number MIS
```

```

SING=LISTWISE
REPORTMISSING=NO
/GRAPHSPEC SOURCE=INLINE.
BEGIN GPL
SOURCE: s=userSource(id("graphdataset"))
DATA: framenum=col(source(s), name("framenum"))
DATA: error_mm=col(source(s), name("error_mm"))
DATA: seq_number=col(source(s), name("seq_number"), unit.category())
GUIDE: axis(dim(1), label("framenum"))
GUIDE: axis(dim(2), label("error_mm"))
GUIDE: legend(aesthetic(aesthetic.color.interior), label("seq_number"))
GUIDE: text.title(label("Multiple Line of error_mm by framenum by seq_number
"))
ELEMENT: line(position(framenum*error_mm), color.interior(seq_number), missi
ng.wings())
END GPL.

```

## GGraph

### Notes

|                |                                   |                                                                      |
|----------------|-----------------------------------|----------------------------------------------------------------------|
| Output Created |                                   | 29-MAR-2021 15:48:29                                                 |
| Comments       |                                   |                                                                      |
| Input          | Data                              | C:<br>\Data\SubmittedPapers\De<br>nnisPaper\PilotData\Marke<br>r.sav |
|                | Active Dataset                    | DataSet2                                                             |
|                | Filter                            | <none>                                                               |
|                | Weight                            | <none>                                                               |
|                | Split File                        | <none>                                                               |
|                | N of Rows in Working Data<br>File | 5000                                                                 |

## Notes

|           |                                                                                                                                                                                                                                                                                                                                                                                                                                                                                                                                                                                                                                                                                                                                                                                                                                                                            |             |
|-----------|----------------------------------------------------------------------------------------------------------------------------------------------------------------------------------------------------------------------------------------------------------------------------------------------------------------------------------------------------------------------------------------------------------------------------------------------------------------------------------------------------------------------------------------------------------------------------------------------------------------------------------------------------------------------------------------------------------------------------------------------------------------------------------------------------------------------------------------------------------------------------|-------------|
| Syntax    | <pre> GGRAPH   /GRAPHDATASET   NAME="graphdataset"   VARIABLES=framenum   error_mm seq_number   MISSING=LISTWISE   REPORTMISSING=NO   /GRAPHSPEC   SOURCE=INLINE.   BEGIN GPL     SOURCE: s=userSource     (id("graphdataset"))     DATA: framenum=col     (source(s), name     ("framenum"))     DATA: error_mm=col     (source(s), name     ("error_mm"))     DATA: seq_number=col     (source(s), name     ("seq_number"), unit.     category())     GUIDE: axis(dim(1), label     ("framenum"))     GUIDE: axis(dim(2), label     ("error_mm"))     GUIDE: legend(aesthetic     (aesthetic.color.interior),     label("seq_number"))     GUIDE: text.title(label     ("Multiple Line of     error_mm by framenum by     seq_number"))     ELEMENT: line(position     (framenum*error_mm),     color.interior     (seq_number), missing.     wings())   END GPL. </pre> |             |
| Resources | Processor Time                                                                                                                                                                                                                                                                                                                                                                                                                                                                                                                                                                                                                                                                                                                                                                                                                                                             | 00:00:00,77 |
|           | Elapsed Time                                                                                                                                                                                                                                                                                                                                                                                                                                                                                                                                                                                                                                                                                                                                                                                                                                                               | 00:00:00,32 |

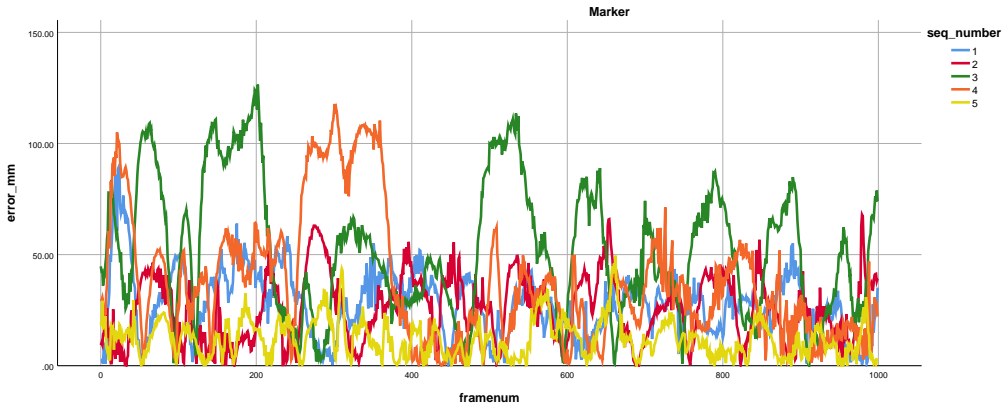

```

DATASET ACTIVATE DataSet4.
* Chart Builder.
GGRAPH
  /GRAPHDATASET NAME="graphdataset" VARIABLES=framenum error_mm seq_number MIS
SING=LISTWISE
  REPORTMISSING=NO
  /GRAPHSPEC SOURCE=INLINE.
BEGIN GPL
  SOURCE: s=userSource(id("graphdataset"))
  DATA: framenum=col(source(s), name("framenum"))
  DATA: error_mm=col(source(s), name("error_mm"))
  DATA: seq_number=col(source(s), name("seq_number"), unit.category())
  GUIDE: axis(dim(1), label("framenum"))
  GUIDE: axis(dim(2), label("error_mm"))
  GUIDE: legend(aesthetic(aesthetic.color.interior), label("seq_number"))
  GUIDE: text.title(label("Multiple Line of error_mm by framenum by seq_number
"))
  ELEMENT: line(position(framenum*error_mm), color.interior(seq_number), missi
ng.wings())
END GPL.

```

## GGraph



## Notes

|                |                                   |                                                                       |
|----------------|-----------------------------------|-----------------------------------------------------------------------|
| Output Created |                                   | 29-MAR-2021 15:51:43                                                  |
| Comments       |                                   |                                                                       |
| Input          | Data                              | C:<br>\Data\SubmittedPapers\De<br>nnisPaper\PilotData\OneH<br>and.sav |
|                | Active Dataset                    | DataSet4                                                              |
|                | Filter                            | <none>                                                                |
|                | Weight                            | <none>                                                                |
|                | Split File                        | <none>                                                                |
|                | N of Rows in Working Data<br>File | 5000                                                                  |

## Notes

|                |                                                                                                                                                                                                                                                                                                                                                                                                                                                                                                                                                                                                                                                                                                                                                                                                                                                                            |                |             |              |             |
|----------------|----------------------------------------------------------------------------------------------------------------------------------------------------------------------------------------------------------------------------------------------------------------------------------------------------------------------------------------------------------------------------------------------------------------------------------------------------------------------------------------------------------------------------------------------------------------------------------------------------------------------------------------------------------------------------------------------------------------------------------------------------------------------------------------------------------------------------------------------------------------------------|----------------|-------------|--------------|-------------|
| Syntax         | <pre> GGRAPH   /GRAPHDATASET   NAME="graphdataset"   VARIABLES=framenum   error_mm seq_number   MISSING=LISTWISE   REPORTMISSING=NO   /GRAPHSPEC   SOURCE=INLINE.   BEGIN GPL     SOURCE: s=userSource     (id("graphdataset"))     DATA: framenum=col     (source(s), name     ("framenum"))     DATA: error_mm=col     (source(s), name     ("error_mm"))     DATA: seq_number=col     (source(s), name     ("seq_number"), unit.     category())     GUIDE: axis(dim(1), label     ("framenum"))     GUIDE: axis(dim(2), label     ("error_mm"))     GUIDE: legend(aesthetic     (aesthetic.color.interior),     label("seq_number"))     GUIDE: text.title(label     ("Multiple Line of     error_mm by framenum by     seq_number"))     ELEMENT: line(position     (framenum*error_mm),     color.interior     (seq_number), missing.     wings())   END GPL. </pre> |                |             |              |             |
| Resources      | <table> <tr> <td>Processor Time</td><td>00:00:00,98</td></tr> <tr> <td>Elapsed Time</td><td>00:00:00,49</td></tr> </table>                                                                                                                                                                                                                                                                                                                                                                                                                                                                                                                                                                                                                                                                                                                                                 | Processor Time | 00:00:00,98 | Elapsed Time | 00:00:00,49 |
| Processor Time | 00:00:00,98                                                                                                                                                                                                                                                                                                                                                                                                                                                                                                                                                                                                                                                                                                                                                                                                                                                                |                |             |              |             |
| Elapsed Time   | 00:00:00,49                                                                                                                                                                                                                                                                                                                                                                                                                                                                                                                                                                                                                                                                                                                                                                                                                                                                |                |             |              |             |

[DataSet4] C:\Data\SubmittedPapers\DennisPaper\PilotData\OneHand.sav

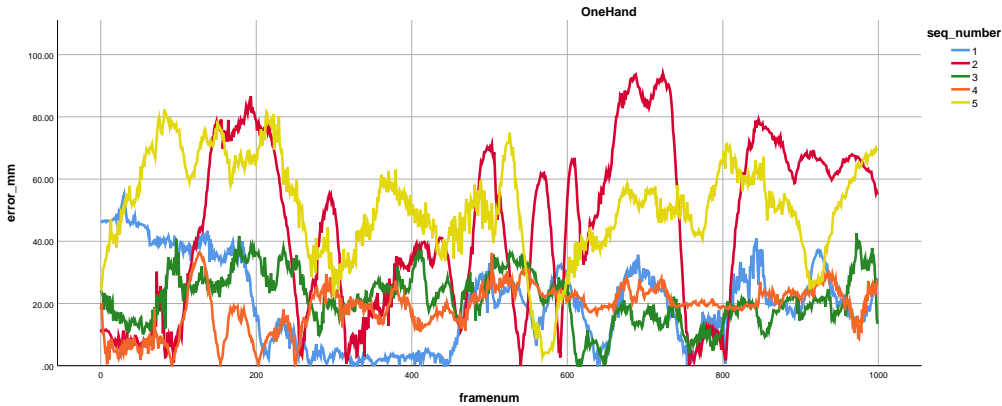

```

DATASET ACTIVATE DataSet5.
* Chart Builder.
GGRAPH
  /GRAPHDATASET NAME="graphdataset" VARIABLES=framenum error_mm seq_number MIS
SING=LISTWISE
  REPORTMISSING=NO
  /GRAPHSPEC SOURCE=INLINE.
BEGIN GPL
  SOURCE: s=userSource(id("graphdataset"))
  DATA: framenum=col(source(s), name("framenum"))
  DATA: error_mm=col(source(s), name("error_mm"))
  DATA: seq_number=col(source(s), name("seq_number"), unit.category())
  GUIDE: axis(dim(1), label("framenum"))
  GUIDE: axis(dim(2), label("error_mm"))
  GUIDE: legend(aesthetic(aesthetic.color.interior), label("seq_number"))
  GUIDE: text.title(label("Multiple Line of error_mm by framenum by seq_number
"))
  ELEMENT: line(position(framenum*error_mm), color.interior(seq_number), missi
ng.wings())
END GPL.

```

## GGraph

## Notes

|                |                                   |                                                                       |
|----------------|-----------------------------------|-----------------------------------------------------------------------|
| Output Created |                                   | 29-MAR-2021 15:53:09                                                  |
| Comments       |                                   |                                                                       |
| Input          | Data                              | C:<br>\Data\SubmittedPapers\De<br>nnisPaper\PilotData\TwoH<br>and.sav |
|                | Active Dataset                    | DataSet5                                                              |
|                | Filter                            | <none>                                                                |
|                | Weight                            | <none>                                                                |
|                | Split File                        | <none>                                                                |
|                | N of Rows in Working Data<br>File | 5000                                                                  |

## Notes

|                |                                                                                                                                                                                                                                                                                                                                                                                                                                                                                                                                                                                                                                                                                                                                                                                                                                                                            |                |             |
|----------------|----------------------------------------------------------------------------------------------------------------------------------------------------------------------------------------------------------------------------------------------------------------------------------------------------------------------------------------------------------------------------------------------------------------------------------------------------------------------------------------------------------------------------------------------------------------------------------------------------------------------------------------------------------------------------------------------------------------------------------------------------------------------------------------------------------------------------------------------------------------------------|----------------|-------------|
| Syntax         | <pre> GGRAPH   /GRAPHDATASET   NAME="graphdataset"   VARIABLES=framenum   error_mm seq_number   MISSING=LISTWISE   REPORTMISSING=NO   /GRAPHSPEC   SOURCE=INLINE.   BEGIN GPL     SOURCE: s=userSource     (id("graphdataset"))     DATA: framenum=col     (source(s), name     ("framenum"))     DATA: error_mm=col     (source(s), name     ("error_mm"))     DATA: seq_number=col     (source(s), name     ("seq_number"), unit.     category())     GUIDE: axis(dim(1), label     ("framenum"))     GUIDE: axis(dim(2), label     ("error_mm"))     GUIDE: legend(aesthetic     (aesthetic.color.interior),     label("seq_number"))     GUIDE: text.title(label     ("Multiple Line of     error_mm by framenum by     seq_number"))     ELEMENT: line(position     (framenum*error_mm),     color.interior     (seq_number), missing.     wings())   END GPL. </pre> |                |             |
| Resources      | <table> <tr> <td>Processor Time</td> <td>00:00:00,30</td> </tr> </table>                                                                                                                                                                                                                                                                                                                                                                                                                                                                                                                                                                                                                                                                                                                                                                                                   | Processor Time | 00:00:00,30 |
| Processor Time | 00:00:00,30                                                                                                                                                                                                                                                                                                                                                                                                                                                                                                                                                                                                                                                                                                                                                                                                                                                                |                |             |
|                | <table> <tr> <td>Elapsed Time</td> <td>00:00:00,17</td> </tr> </table>                                                                                                                                                                                                                                                                                                                                                                                                                                                                                                                                                                                                                                                                                                                                                                                                     | Elapsed Time   | 00:00:00,17 |
| Elapsed Time   | 00:00:00,17                                                                                                                                                                                                                                                                                                                                                                                                                                                                                                                                                                                                                                                                                                                                                                                                                                                                |                |             |

[DataSet5] C:\Data\SubmittedPapers\DennisPaper\PilotData\TwoHand.sav

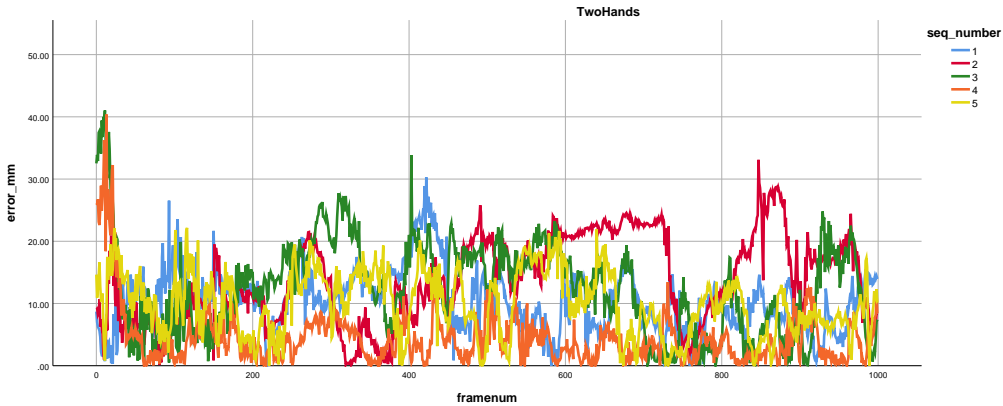

```

DATASET ACTIVATE DataSet1.
* Chart Builder.
GGRAPH
  /GRAPHDATASET NAME="graphdataset" VARIABLES=seq_number error_mm MISSING=LIST
WISE REPORTMISSING=NO
  /GRAPHSPEC SOURCE=INLINE.
BEGIN GPL
  SOURCE: s=userSource(id("graphdataset"))
  DATA: seq_number=col(source(s), name("seq_number"), unit.category())
  DATA: error_mm=col(source(s), name("error_mm"))
  DATA: id=col(source(s), name("$CASENUM"), unit.category())
  GUIDE: axis(dim(1), label("seq_number"))
  GUIDE: axis(dim(2), label("error_mm"))
  GUIDE: text.title(label("Simple Boxplot of error_mm by seq_number"))
  SCALE: linear(dim(2), include(0))
  ELEMENT: schema(position(bin.quantile.letter*seq_number*error_mm), label(id
))
END GPL.

```

## GGraph

## Notes

|                |                                   |                                                                          |
|----------------|-----------------------------------|--------------------------------------------------------------------------|
| Output Created |                                   | 29-MAR-2021 15:55:13                                                     |
| Comments       |                                   |                                                                          |
| Input          | Data                              | C:<br>\Data\SubmittedPapers\De<br>nnisPaper\PilotData\Fixed<br>Point.sav |
|                | Active Dataset                    | DataSet1                                                                 |
|                | Filter                            | <none>                                                                   |
|                | Weight                            | <none>                                                                   |
|                | Split File                        | <none>                                                                   |
|                | N of Rows in Working Data<br>File | 5000                                                                     |

## Notes

|           |                                                                                                                                                                                                                                                                                                                                                                                                                                                                                                                                                                                                                                                                                                                                                                                                            |             |
|-----------|------------------------------------------------------------------------------------------------------------------------------------------------------------------------------------------------------------------------------------------------------------------------------------------------------------------------------------------------------------------------------------------------------------------------------------------------------------------------------------------------------------------------------------------------------------------------------------------------------------------------------------------------------------------------------------------------------------------------------------------------------------------------------------------------------------|-------------|
| Syntax    | <pre> GGRAPH   /GRAPHDATASET   NAME="graphdataset"   VARIABLES=seq_number   error_mm   MISSING=LISTWISE   REPORTMISSING=NO   /GRAPHSPEC   SOURCE=INLINE.   BEGIN GPL     SOURCE: s=userSource     (id("graphdataset"))     DATA: seq_number=col     (source(s), name     ("seq_number"), unit.     category())     DATA: error_mm=col     (source(s), name     ("error_mm"))     DATA: id=col(source(s),     name("\$CASENUM"), unit.     category())     GUIDE: axis(dim(1), label     ("seq_number"))     GUIDE: axis(dim(2), label     ("error_mm"))     GUIDE: text.title(label     ("Simple Boxplot of     error_mm by     seq_number"))     SCALE: linear(dim(2),     include(0))     ELEMENT: schema     (position(bin.quantile.letter     (seq_number*error_mm)),     label(id))   END GPL. </pre> |             |
| Resources | Processor Time                                                                                                                                                                                                                                                                                                                                                                                                                                                                                                                                                                                                                                                                                                                                                                                             | 00:00:00,77 |
|           | Elapsed Time                                                                                                                                                                                                                                                                                                                                                                                                                                                                                                                                                                                                                                                                                                                                                                                               | 00:00:00,45 |

[DataSet1] C:\Data\SubmittedPapers\DennisPaper\PilotData\FixedPoint.sav



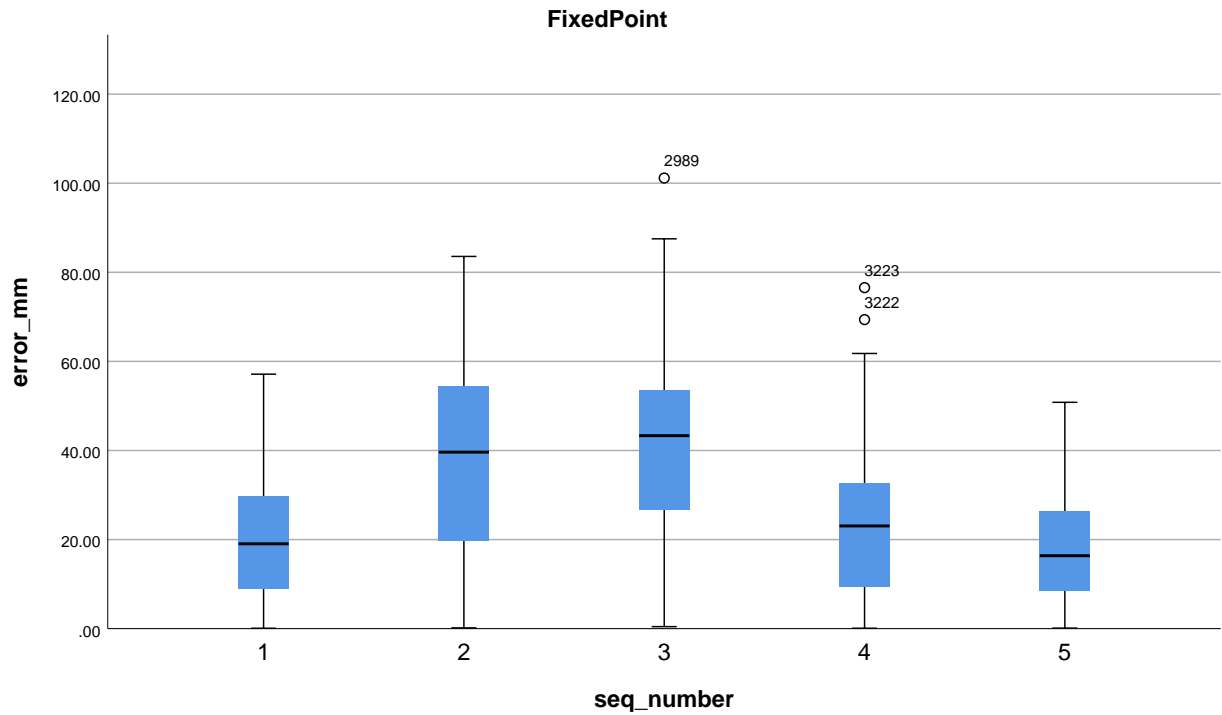

```

EXAMINE VARIABLES=error_mm BY seq_number
  /PLOT BOXPLOT NPLOT
  /COMPARE GROUPS
  /STATISTICS DESCRIPTIVES
  /CINTERVAL 95
  /MISSING LISTWISE
  /NOTOTAL.

```

## Explore

## Notes

|                        |                                   |                                                                                                                                                                              |
|------------------------|-----------------------------------|------------------------------------------------------------------------------------------------------------------------------------------------------------------------------|
| Output Created         |                                   | 29-MAR-2021 15:56:06                                                                                                                                                         |
| Comments               |                                   |                                                                                                                                                                              |
| Input                  | Data                              | C:<br>\Data\SubmittedPapers\De<br>nnisPaper\PilotData\Fixed<br>Point.sav                                                                                                     |
|                        | Active Dataset                    | DataSet1                                                                                                                                                                     |
|                        | Filter                            | <none>                                                                                                                                                                       |
|                        | Weight                            | <none>                                                                                                                                                                       |
|                        | Split File                        | <none>                                                                                                                                                                       |
|                        | N of Rows in Working Data<br>File | 5000                                                                                                                                                                         |
| Missing Value Handling | Definition of Missing             | User-defined missing<br>values for dependent<br>variables are treated as<br>missing.                                                                                         |
|                        | Cases Used                        | Statistics are based on<br>cases with no missing<br>values for any dependent<br>variable or factor used.                                                                     |
| Syntax                 |                                   | EXAMINE<br>VARIABLES=error_mm<br>BY seq_number<br>/PLOT BOXPLOT<br>NPLOT<br>/COMPARE GROUPS<br>/STATISTICS<br>DESCRIPTIVES<br>/INTERVAL 95<br>/MISSING LISTWISE<br>/NOTOTAL. |
| Resources              | Processor Time                    | 00:00:03,37                                                                                                                                                                  |
|                        | Elapsed Time                      | 00:00:01,72                                                                                                                                                                  |

## FixedPoint

## Case Processing Summary

|          |            | Valid |         | Cases Missing |         | Total |         |
|----------|------------|-------|---------|---------------|---------|-------|---------|
|          | seq_number | N     | Percent | N             | Percent | N     | Percent |
| error_mm | 1          | 1000  | 100.0%  | 0             | 0.0%    | 1000  | 100.0%  |
|          | 2          | 1000  | 100.0%  | 0             | 0.0%    | 1000  | 100.0%  |
|          | 3          | 1000  | 100.0%  | 0             | 0.0%    | 1000  | 100.0%  |
|          | 4          | 1000  | 100.0%  | 0             | 0.0%    | 1000  | 100.0%  |
|          | 5          | 1000  | 100.0%  | 0             | 0.0%    | 1000  | 100.0%  |

## Descriptives

|          |   | seq_number                       | Statistic   |          | Std. Error |
|----------|---|----------------------------------|-------------|----------|------------|
| error_mm | 1 | Mean                             |             | 20.1168  | .41055     |
|          |   | 95% Confidence Interval for Mean | Lower Bound | 19.3112  |            |
|          |   |                                  | Upper Bound | 20.9225  |            |
|          |   | 5% Trimmed Mean                  |             | 19.6992  |            |
|          |   | Median                           |             | 19.0503  |            |
|          |   | Variance                         |             | 168.549  |            |
|          |   | Std. Deviation                   |             | 12.98265 |            |
|          |   | Minimum                          |             | .09      |            |
|          |   | Maximum                          |             | 57.14    |            |
|          |   | Range                            |             | 57.04    |            |
|          |   | Interquartile Range              |             | 20.81    |            |
|          |   | Skewness                         |             | .362     | .077       |
|          |   | Kurtosis                         |             | -.752    | .155       |
|          | 2 | Mean                             |             | 37.6751  | .66173     |
|          |   | 95% Confidence Interval for Mean | Lower Bound | 36.3766  |            |
|          |   |                                  | Upper Bound | 38.9737  |            |
|          |   | 5% Trimmed Mean                  |             | 37.6275  |            |
|          |   | Median                           |             | 39.6305  |            |
|          |   | Variance                         |             | 437.886  |            |
|          |   | Std. Deviation                   |             | 20.92572 |            |
|          |   | Minimum                          |             | .18      |            |
|          |   | Maximum                          |             | 83.56    |            |
|          |   | Range                            |             | 83.38    |            |
|          |   | Interquartile Range              |             | 34.83    |            |
|          |   | Skewness                         |             | -.043    | .077       |

## Descriptives

| seq_number |                                  | Statistic   | Std. Error |
|------------|----------------------------------|-------------|------------|
| 3          | Kurtosis                         | -1.114      | .155       |
|            | Mean                             | 39.7536     | .58305     |
|            | 95% Confidence Interval for Mean | Lower Bound | 38.6095    |
|            |                                  | Upper Bound | 40.8978    |
|            | 5% Trimmed Mean                  | 39.9454     |            |
|            | Median                           | 43.3260     |            |
|            | Variance                         | 339.952     |            |
|            | Std. Deviation                   | 18.43778    |            |
|            | Minimum                          | .45         |            |
|            | Maximum                          | 101.16      |            |
|            | Range                            | 100.71      |            |
|            | Interquartile Range              | 26.94       |            |
|            | Skewness                         | -.353       | .077       |
|            | Kurtosis                         | -.595       | .155       |
| 4          | Mean                             | 22.3166     | .42286     |
|            | 95% Confidence Interval for Mean | Lower Bound | 21.4868    |
|            |                                  | Upper Bound | 23.1465    |
|            | 5% Trimmed Mean                  | 22.0059     |            |
|            | Median                           | 23.0621     |            |
|            | Variance                         | 178.814     |            |
|            | Std. Deviation                   | 13.37214    |            |
|            | Minimum                          | .10         |            |
|            | Maximum                          | 76.56       |            |
|            | Range                            | 76.46       |            |
|            | Interquartile Range              | 23.17       |            |
|            | Skewness                         | .187        | .077       |
|            | Kurtosis                         | -.680       | .155       |
| 5          | Mean                             | 18.0630     | .37646     |
|            | 95% Confidence Interval for Mean | Lower Bound | 17.3242    |
|            |                                  | Upper Bound | 18.8017    |
|            | 5% Trimmed Mean                  | 17.5127     |            |
|            | Median                           | 16.3767     |            |
|            | Variance                         | 141.724     |            |
|            | Std. Deviation                   | 11.90480    |            |
|            | Minimum                          | .12         |            |

## Descriptives

| seq_number |                     | Statistic | Std. Error |
|------------|---------------------|-----------|------------|
|            | Maximum             | 50.81     |            |
|            | Range               | 50.69     |            |
|            | Interquartile Range | 17.92     |            |
|            | Skewness            | .547      | .077       |
|            | Kurtosis            | -.442     | .155       |

## Tests of Normality

|          |            | Kolmogorov-Smirnov <sup>a</sup> |      |      | Shapiro-Wilk |      |      |
|----------|------------|---------------------------------|------|------|--------------|------|------|
|          | seq_number | Statistic                       | df   | Sig. | Statistic    | df   | Sig. |
| error_mm | 1          | .062                            | 1000 | .000 | .965         | 1000 | .000 |
|          | 2          | .068                            | 1000 | .000 | .964         | 1000 | .000 |
|          | 3          | .095                            | 1000 | .000 | .961         | 1000 | .000 |
|          | 4          | .086                            | 1000 | .000 | .963         | 1000 | .000 |
|          | 5          | .078                            | 1000 | .000 | .958         | 1000 | .000 |

a. Lilliefors Significance Correction

\*Nonparametric Tests: Independent Samples.

NPTESTS

/INDEPENDENT TEST (error\_mm) GROUP (seq\_number) KRUSKAL\_WALLIS (COMPARE=PAIRWISE)

/MISSING SCOPE=ANALYSIS USERMISSING=EXCLUDE

/CRITERIA ALPHA=0.05 CILEVEL=95.

## FixedPoint

## Notes

|                |                                |                                                                                                                                                                                                      |
|----------------|--------------------------------|------------------------------------------------------------------------------------------------------------------------------------------------------------------------------------------------------|
| Output Created |                                | 29-MAR-2021 15:58:02                                                                                                                                                                                 |
| Comments       |                                |                                                                                                                                                                                                      |
| Input          | Data                           | C:\Data\SubmittedPapers\DennisPaper\PilotData\Fixed Point.sav                                                                                                                                        |
|                | Active Dataset                 | DataSet1                                                                                                                                                                                             |
|                | Filter                         | <none>                                                                                                                                                                                               |
|                | Weight                         | <none>                                                                                                                                                                                               |
|                | Split File                     | <none>                                                                                                                                                                                               |
|                | N of Rows in Working Data File | 5000                                                                                                                                                                                                 |
| Syntax         |                                | NPTESTS<br>/INDEPENDENT TEST<br>(error_mm) GROUP<br>(seq_number)<br>KRUSKAL_WALLIS<br>(COMPARE=PAIRWISE)<br>/MISSING<br>SCOPE=ANALYSIS<br>USERMISSING=EXCLUDE<br>/CRITERIA ALPHA=0.05<br>CILEVEL=95. |
| Resources      | Processor Time                 | 00:00:00,83                                                                                                                                                                                          |
|                | Elapsed Time                   | 00:00:00,47                                                                                                                                                                                          |

## Hypothesis Test Summary

|   | Null Hypothesis                                                           | Test                                    | Sig. | Decision                    |
|---|---------------------------------------------------------------------------|-----------------------------------------|------|-----------------------------|
| 1 | The distribution of error_mm is the same across categories of seq_number. | Independent-Samples Kruskal-Wallis Test | .000 | Reject the null hypothesis. |

Asymptotic significances are displayed. The significance level is .05.

\* Chart Builder.

GGRAPH

```

/GRAPHDATASET NAME="graphdataset" VARIABLES=seq_number error_mm MISSING=LIST
WISE REPORTMISSING=NO
/GRAPHSPEC SOURCE=INLINE.
BEGIN GPL
SOURCE: s=userSource(id("graphdataset"))
DATA: seq_number=col(source(s), name("seq_number"), unit.category())
DATA: error_mm=col(source(s), name("error_mm"))
DATA: id=col(source(s), name("$CASENUM"), unit.category())
GUIDE: axis(dim(1), label("seq_number"))
GUIDE: axis(dim(2), label("error_mm"))
GUIDE: text.title(label("Simple Boxplot of error_mm by seq_number"))
SCALE: linear(dim(2), include(0))
ELEMENT: schema(position(bin.quantile.letter*seq_number*error_mm), label(id
))
END GPL.

```

## GGraph

### Notes

|                |                                   |                                                                      |
|----------------|-----------------------------------|----------------------------------------------------------------------|
| Output Created |                                   | 29-MAR-2021 16:00:39                                                 |
| Comments       |                                   |                                                                      |
| Input          | Data                              | C:<br>\Data\SubmittedPapers\De<br>nnisPaper\PilotData\Marke<br>r.sav |
|                | Active Dataset                    | DataSet2                                                             |
|                | Filter                            | <none>                                                               |
|                | Weight                            | <none>                                                               |
|                | Split File                        | <none>                                                               |
|                | N of Rows in Working Data<br>File | 5000                                                                 |

## Notes

|                |                                                                                                                                                                                                                                                                                                                                                                                                                                                                                                                                                                                                                                                                                                                                                                                                            |                |             |              |             |
|----------------|------------------------------------------------------------------------------------------------------------------------------------------------------------------------------------------------------------------------------------------------------------------------------------------------------------------------------------------------------------------------------------------------------------------------------------------------------------------------------------------------------------------------------------------------------------------------------------------------------------------------------------------------------------------------------------------------------------------------------------------------------------------------------------------------------------|----------------|-------------|--------------|-------------|
| Syntax         | <pre> GGRAPH   /GRAPHDATASET   NAME="graphdataset"   VARIABLES=seq_number   error_mm   MISSING=LISTWISE   REPORTMISSING=NO   /GRAPHSPEC   SOURCE=INLINE.   BEGIN GPL     SOURCE: s=userSource     (id("graphdataset"))     DATA: seq_number=col     (source(s), name     ("seq_number"), unit.     category())     DATA: error_mm=col     (source(s), name     ("error_mm"))     DATA: id=col(source(s),     name("\$CASENUM"), unit.     category())     GUIDE: axis(dim(1), label     ("seq_number"))     GUIDE: axis(dim(2), label     ("error_mm"))     GUIDE: text.title(label     ("Simple Boxplot of     error_mm by     seq_number"))     SCALE: linear(dim(2),     include(0))     ELEMENT: schema     (position(bin.quantile.letter     (seq_number*error_mm)),     label(id))   END GPL. </pre> |                |             |              |             |
| Resources      | <table> <tr> <td data-bbox="358 1411 673 1449">Processor Time</td><td data-bbox="673 1411 997 1449">00:00:00,55</td></tr> <tr> <td data-bbox="358 1449 673 1491">Elapsed Time</td><td data-bbox="673 1449 997 1491">00:00:00,44</td></tr> </table>                                                                                                                                                                                                                                                                                                                                                                                                                                                                                                                                                         | Processor Time | 00:00:00,55 | Elapsed Time | 00:00:00,44 |
| Processor Time | 00:00:00,55                                                                                                                                                                                                                                                                                                                                                                                                                                                                                                                                                                                                                                                                                                                                                                                                |                |             |              |             |
| Elapsed Time   | 00:00:00,44                                                                                                                                                                                                                                                                                                                                                                                                                                                                                                                                                                                                                                                                                                                                                                                                |                |             |              |             |



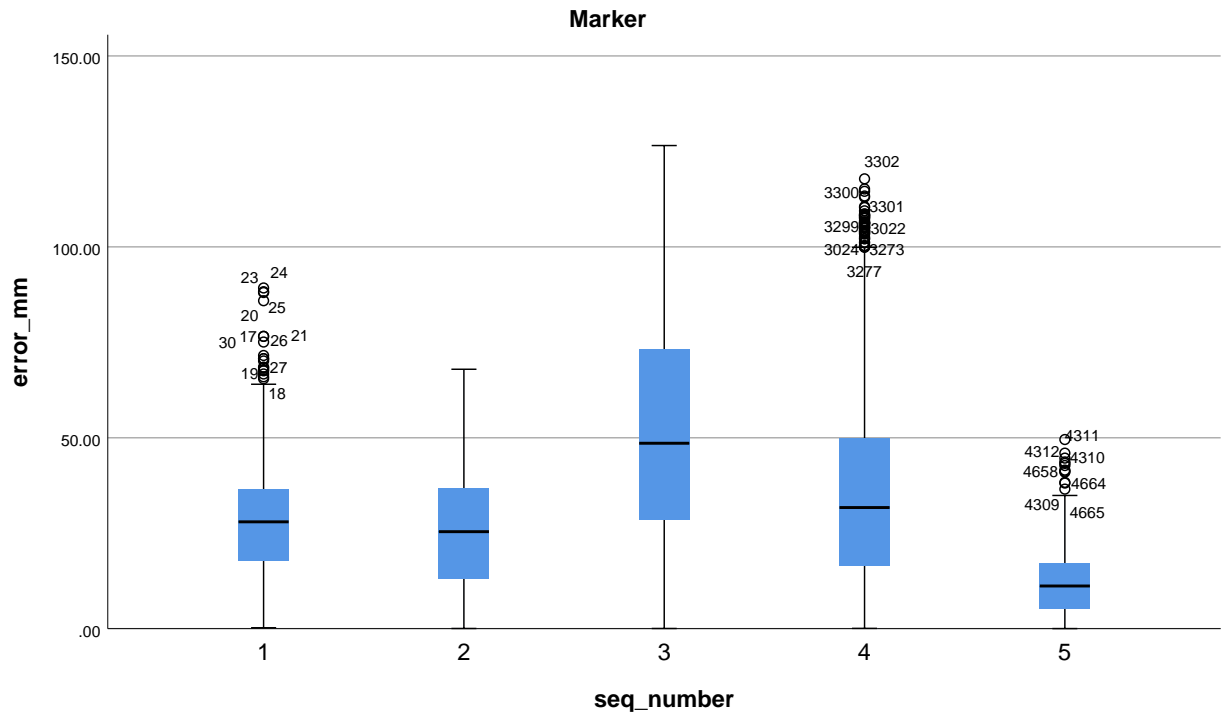

```

EXAMINE VARIABLES=error_mm BY seq_number
/PLOT BOXPLOT NPLOT
/COMPARE GROUPS
/STATISTICS DESCRIPTIVES
/CINTERVAL 95
/MISSING LISTWISE
/NOTOTAL.

```

## Explore

## Notes

|                        |                                |                                                                                                                                                                              |
|------------------------|--------------------------------|------------------------------------------------------------------------------------------------------------------------------------------------------------------------------|
| Output Created         |                                | 29-MAR-2021 16:01:27                                                                                                                                                         |
| Comments               |                                |                                                                                                                                                                              |
| Input                  | Data                           | C:<br>\Data\SubmittedPapers\De<br>nnisPaper\PilotData\Marke<br>r.sav                                                                                                         |
|                        | Active Dataset                 | DataSet2                                                                                                                                                                     |
|                        | Filter                         | <none>                                                                                                                                                                       |
|                        | Weight                         | <none>                                                                                                                                                                       |
|                        | Split File                     | <none>                                                                                                                                                                       |
|                        | N of Rows in Working Data File | 5000                                                                                                                                                                         |
| Missing Value Handling | Definition of Missing          | User-defined missing values for dependent variables are treated as missing.                                                                                                  |
|                        | Cases Used                     | Statistics are based on cases with no missing values for any dependent variable or factor used.                                                                              |
| Syntax                 |                                | EXAMINE<br>VARIABLES=error_mm<br>BY seq_number<br>/PLOT BOXPLOT<br>NPLOT<br>/COMPARE GROUPS<br>/STATISTICS<br>DESCRIPTIVES<br>/INTERVAL 95<br>/MISSING LISTWISE<br>/NOTOTAL. |
| Resources              | Processor Time                 | 00:00:02,08                                                                                                                                                                  |
|                        | Elapsed Time                   | 00:00:01,73                                                                                                                                                                  |

## Marker

## Case Processing Summary

|          |            | Valid |         | Cases Missing |         | Total |         |
|----------|------------|-------|---------|---------------|---------|-------|---------|
|          | seq_number | N     | Percent | N             | Percent | N     | Percent |
| error_mm | 1          | 1000  | 100.0%  | 0             | 0.0%    | 1000  | 100.0%  |
|          | 2          | 1000  | 100.0%  | 0             | 0.0%    | 1000  | 100.0%  |
|          | 3          | 1000  | 100.0%  | 0             | 0.0%    | 1000  | 100.0%  |
|          | 4          | 1000  | 100.0%  | 0             | 0.0%    | 1000  | 100.0%  |
|          | 5          | 1000  | 100.0%  | 0             | 0.0%    | 1000  | 100.0%  |

## Descriptives

|          |   | seq_number                       | Statistic   |          | Std. Error |
|----------|---|----------------------------------|-------------|----------|------------|
| error_mm | 1 | Mean                             |             | 28.0038  | .45892     |
|          |   | 95% Confidence Interval for Mean | Lower Bound | 27.1033  |            |
|          |   |                                  | Upper Bound | 28.9044  |            |
|          |   | 5% Trimmed Mean                  |             | 27.5409  |            |
|          |   | Median                           |             | 27.9788  |            |
|          |   | Variance                         |             | 210.607  |            |
|          |   | Std. Deviation                   |             | 14.51231 |            |
|          |   | Minimum                          |             | .24      |            |
|          |   | Maximum                          |             | 89.23    |            |
|          |   | Range                            |             | 88.99    |            |
|          |   | Interquartile Range              |             | 18.70    |            |
|          |   | Skewness                         |             | .492     | .077       |
|          |   | Kurtosis                         |             | .891     | .155       |
|          | 2 | Mean                             |             | 25.4099  | .46781     |
|          |   | 95% Confidence Interval for Mean | Lower Bound | 24.4919  |            |
|          |   |                                  | Upper Bound | 26.3279  |            |
|          |   | 5% Trimmed Mean                  |             | 24.9923  |            |
|          |   | Median                           |             | 25.4035  |            |
|          |   | Variance                         |             | 218.848  |            |
|          |   | Std. Deviation                   |             | 14.79353 |            |
|          |   | Minimum                          |             | .05      |            |
|          |   | Maximum                          |             | 67.94    |            |
|          |   | Range                            |             | 67.89    |            |
|          |   | Interquartile Range              |             | 23.67    |            |
|          |   | Skewness                         |             | .249     | .077       |

## Descriptives

| seq_number |                                  | Statistic   | Std. Error |
|------------|----------------------------------|-------------|------------|
| 3          | Kurtosis                         | -.587       | .155       |
|            | Mean                             | 52.1544     | .93625     |
|            | 95% Confidence Interval for Mean | Lower Bound | 50.3171    |
|            |                                  | Upper Bound | 53.9916    |
|            | 5% Trimmed Mean                  | 51.5335     |            |
|            | Median                           | 48.5598     |            |
|            | Variance                         | 876.572     |            |
|            | Std. Deviation                   | 29.60696    |            |
|            | Minimum                          | .05         |            |
|            | Maximum                          | 126.53      |            |
|            | Range                            | 126.48      |            |
|            | Interquartile Range              | 44.65       |            |
|            | Skewness                         | .353        | .077       |
|            | Kurtosis                         | -.778       | .155       |
| 4          | Mean                             | 37.7096     | .89391     |
|            | 95% Confidence Interval for Mean | Lower Bound | 35.9555    |
|            |                                  | Upper Bound | 39.4638    |
|            | 5% Trimmed Mean                  | 35.9131     |            |
|            | Median                           | 31.7203     |            |
|            | Variance                         | 799.073     |            |
|            | Std. Deviation                   | 28.26787    |            |
|            | Minimum                          | .08         |            |
|            | Maximum                          | 117.81      |            |
|            | Range                            | 117.74      |            |
|            | Interquartile Range              | 33.36       |            |
|            | Skewness                         | 1.002       | .077       |
|            | Kurtosis                         | .287        | .155       |
| 5          | Mean                             | 12.0981     | .26282     |
|            | 95% Confidence Interval for Mean | Lower Bound | 11.5823    |
|            |                                  | Upper Bound | 12.6138    |
|            | 5% Trimmed Mean                  | 11.5773     |            |
|            | Median                           | 11.1784     |            |
|            | Variance                         | 69.072      |            |
|            | Std. Deviation                   | 8.31098     |            |
|            | Minimum                          | .02         |            |

## Descriptives

| seq_number |                     | Statistic | Std. Error |
|------------|---------------------|-----------|------------|
|            | Maximum             | 49.54     |            |
|            | Range               | 49.52     |            |
|            | Interquartile Range | 11.89     |            |
|            | Skewness            | .879      | .077       |
|            | Kurtosis            | 1.088     | .155       |

## Tests of Normality

|          |            | Kolmogorov-Smirnov <sup>a</sup> |      |      | Shapiro-Wilk |      |      |
|----------|------------|---------------------------------|------|------|--------------|------|------|
|          | seq_number | Statistic                       | df   | Sig. | Statistic    | df   | Sig. |
| error_mm | 1          | .028                            | 1000 | .065 | .978         | 1000 | .000 |
|          | 2          | .059                            | 1000 | .000 | .977         | 1000 | .000 |
|          | 3          | .065                            | 1000 | .000 | .968         | 1000 | .000 |
|          | 4          | .098                            | 1000 | .000 | .901         | 1000 | .000 |
|          | 5          | .073                            | 1000 | .000 | .946         | 1000 | .000 |

a. Lilliefors Significance Correction

\*Nonparametric Tests: Independent Samples.

NPTESTS

/INDEPENDENT TEST (error\_mm) GROUP (seq\_number) KRUSKAL\_WALLIS (COMPARE=PAIRWISE)

/MISSING SCOPE=ANALYSIS USERMISSING=EXCLUDE

/CRITERIA ALPHA=0.05 CILEVEL=95.

## Marker

### Notes

|                |                                |                                                                                                                                                                                                      |
|----------------|--------------------------------|------------------------------------------------------------------------------------------------------------------------------------------------------------------------------------------------------|
| Output Created |                                | 29-MAR-2021 16:02:37                                                                                                                                                                                 |
| Comments       |                                |                                                                                                                                                                                                      |
| Input          | Data                           | C:\Data\SubmittedPapers\DennisPaper\PilotData\Marker.sav                                                                                                                                             |
|                | Active Dataset                 | DataSet2                                                                                                                                                                                             |
|                | Filter                         | <none>                                                                                                                                                                                               |
|                | Weight                         | <none>                                                                                                                                                                                               |
|                | Split File                     | <none>                                                                                                                                                                                               |
|                | N of Rows in Working Data File | 5000                                                                                                                                                                                                 |
| Syntax         |                                | NPTESTS<br>/INDEPENDENT TEST<br>(error_mm) GROUP<br>(seq_number)<br>KRUSKAL_WALLIS<br>(COMPARE=PAIRWISE)<br>/MISSING<br>SCOPE=ANALYSIS<br>USERMISSING=EXCLUDE<br>/CRITERIA ALPHA=0.05<br>CILEVEL=95. |
| Resources      | Processor Time                 | 00:00:00,37                                                                                                                                                                                          |
|                | Elapsed Time                   | 00:00:00,33                                                                                                                                                                                          |

### Hypothesis Test Summary

|   | Null Hypothesis                                                           | Test                                    | Sig. | Decision                    |
|---|---------------------------------------------------------------------------|-----------------------------------------|------|-----------------------------|
| 1 | The distribution of error_mm is the same across categories of seq_number. | Independent-Samples Kruskal-Wallis Test | .000 | Reject the null hypothesis. |

Asymptotic significances are displayed. The significance level is .05.

\* Chart Builder.

GGRAPH

```

/GRAPHDATASET NAME="graphdataset" VARIABLES=seq_number error_mm MISSING=LIST
WISE REPORTMISSING=NO
/GRAPHSPEC SOURCE=INLINE.
BEGIN GPL
SOURCE: s=userSource(id("graphdataset"))
DATA: seq_number=col(source(s), name("seq_number"), unit.category())
DATA: error_mm=col(source(s), name("error_mm"))
DATA: id=col(source(s), name("$CASENUM"), unit.category())
GUIDE: axis(dim(1), label("seq_number"))
GUIDE: axis(dim(2), label("error_mm"))
GUIDE: text.title(label("Simple Boxplot of error_mm by seq_number"))
SCALE: linear(dim(2), include(0))
ELEMENT: schema(position(bin.quantile.letter*seq_number*error_mm), label(id
))
END GPL.

```

## GGraph

### Notes

|                |                                   |                                                                       |
|----------------|-----------------------------------|-----------------------------------------------------------------------|
| Output Created |                                   | 29-MAR-2021 16:03:25                                                  |
| Comments       |                                   |                                                                       |
| Input          | Data                              | C:<br>\Data\SubmittedPapers\De<br>nnisPaper\PilotData\OneH<br>and.sav |
|                | Active Dataset                    | DataSet4                                                              |
|                | Filter                            | <none>                                                                |
|                | Weight                            | <none>                                                                |
|                | Split File                        | <none>                                                                |
|                | N of Rows in Working Data<br>File | 5000                                                                  |

## Notes

|                |                                                                                                                                                                                                                                                                                                                                                                                                                                                                                                                                                                                                                                                                                                                                                                                                            |                |             |              |             |
|----------------|------------------------------------------------------------------------------------------------------------------------------------------------------------------------------------------------------------------------------------------------------------------------------------------------------------------------------------------------------------------------------------------------------------------------------------------------------------------------------------------------------------------------------------------------------------------------------------------------------------------------------------------------------------------------------------------------------------------------------------------------------------------------------------------------------------|----------------|-------------|--------------|-------------|
| Syntax         | <pre> GGRAPH   /GRAPHDATASET   NAME="graphdataset"   VARIABLES=seq_number   error_mm   MISSING=LISTWISE   REPORTMISSING=NO   /GRAPHSPEC   SOURCE=INLINE.   BEGIN GPL     SOURCE: s=userSource     (id("graphdataset"))     DATA: seq_number=col     (source(s), name     ("seq_number"), unit.     category())     DATA: error_mm=col     (source(s), name     ("error_mm"))     DATA: id=col(source(s),     name("\$CASENUM"), unit.     category())     GUIDE: axis(dim(1), label     ("seq_number"))     GUIDE: axis(dim(2), label     ("error_mm"))     GUIDE: text.title(label     ("Simple Boxplot of     error_mm by     seq_number"))     SCALE: linear(dim(2),     include(0))     ELEMENT: schema     (position(bin.quantile.letter     (seq_number*error_mm)),     label(id))   END GPL. </pre> |                |             |              |             |
| Resources      | <table> <tr> <td data-bbox="358 1411 673 1449">Processor Time</td><td data-bbox="673 1411 997 1449">00:00:00,44</td></tr> <tr> <td data-bbox="358 1449 673 1491">Elapsed Time</td><td data-bbox="673 1449 997 1491">00:00:00,32</td></tr> </table>                                                                                                                                                                                                                                                                                                                                                                                                                                                                                                                                                         | Processor Time | 00:00:00,44 | Elapsed Time | 00:00:00,32 |
| Processor Time | 00:00:00,44                                                                                                                                                                                                                                                                                                                                                                                                                                                                                                                                                                                                                                                                                                                                                                                                |                |             |              |             |
| Elapsed Time   | 00:00:00,32                                                                                                                                                                                                                                                                                                                                                                                                                                                                                                                                                                                                                                                                                                                                                                                                |                |             |              |             |



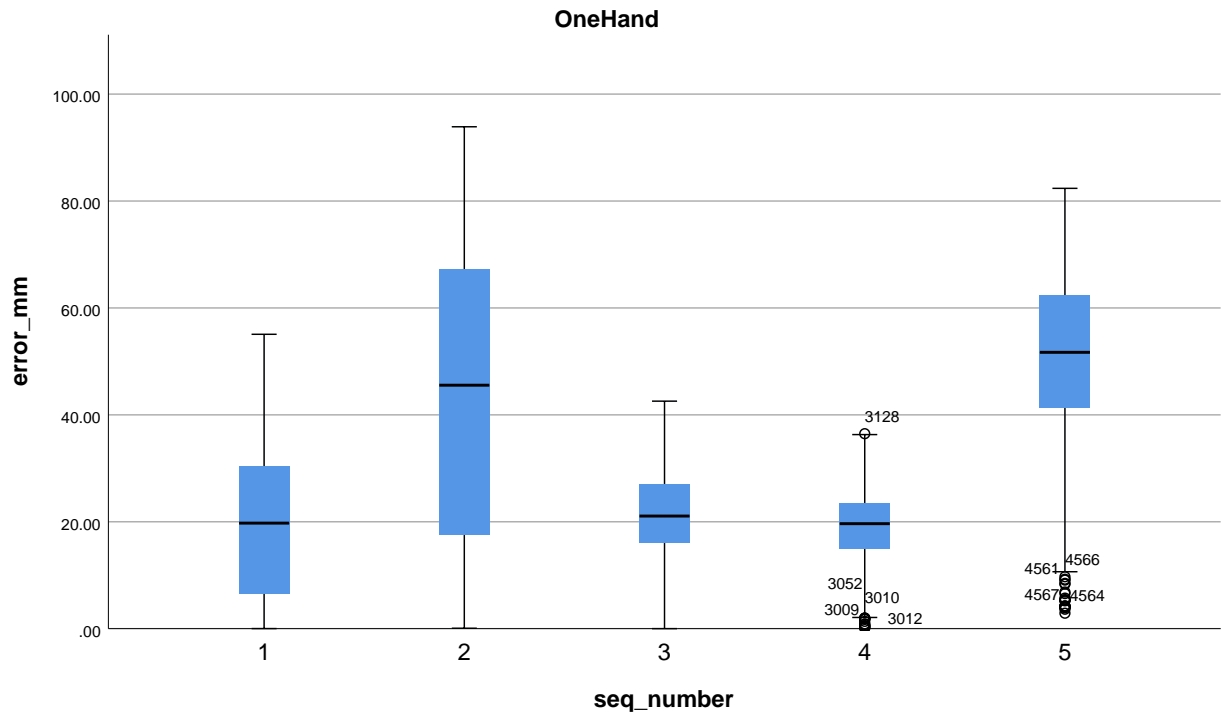

```

EXAMINE VARIABLES=pos_error BY seq_number
/PLOT BOXPLOT NPLOT
/COMPARE GROUPS
/STATISTICS DESCRIPTIVES
/CINTERVAL 95
/MISSING LISTWISE
/NOTOTAL.

```

## Explore

## Notes

|                        |                                |                                                                                                                                                                               |
|------------------------|--------------------------------|-------------------------------------------------------------------------------------------------------------------------------------------------------------------------------|
| Output Created         |                                | 29-MAR-2021 16:04:07                                                                                                                                                          |
| Comments               |                                |                                                                                                                                                                               |
| Input                  | Data                           | C:<br>\Data\SubmittedPapers\De<br>nnisPaper\PilotData\OneH<br>and.sav                                                                                                         |
|                        | Active Dataset                 | DataSet4                                                                                                                                                                      |
|                        | Filter                         | <none>                                                                                                                                                                        |
|                        | Weight                         | <none>                                                                                                                                                                        |
|                        | Split File                     | <none>                                                                                                                                                                        |
|                        | N of Rows in Working Data File | 5000                                                                                                                                                                          |
| Missing Value Handling | Definition of Missing          | User-defined missing values for dependent variables are treated as missing.                                                                                                   |
|                        | Cases Used                     | Statistics are based on cases with no missing values for any dependent variable or factor used.                                                                               |
| Syntax                 |                                | EXAMINE<br>VARIABLES=pos_error<br>BY seq_number<br>/PLOT BOXPLOT<br>NPLOT<br>/COMPARE GROUPS<br>/STATISTICS<br>DESCRIPTIVES<br>/INTERVAL 95<br>/MISSING LISTWISE<br>/NOTOTAL. |
| Resources              | Processor Time                 | 00:00:02,06                                                                                                                                                                   |
|                        | Elapsed Time                   | 00:00:01,79                                                                                                                                                                   |

## OneHand

## Case Processing Summary

|           |            | Valid |         | Cases Missing |         | Total |         |
|-----------|------------|-------|---------|---------------|---------|-------|---------|
|           | seq_number | N     | Percent | N             | Percent | N     | Percent |
| pos_error | 1          | 1000  | 100.0%  | 0             | 0.0%    | 1000  | 100.0%  |
|           | 2          | 1000  | 100.0%  | 0             | 0.0%    | 1000  | 100.0%  |
|           | 3          | 1000  | 100.0%  | 0             | 0.0%    | 1000  | 100.0%  |
|           | 4          | 1000  | 100.0%  | 0             | 0.0%    | 1000  | 100.0%  |
|           | 5          | 1000  | 100.0%  | 0             | 0.0%    | 1000  | 100.0%  |

## Descriptives

|           |   | seq_number                       | Statistic   |            | Std. Error |
|-----------|---|----------------------------------|-------------|------------|------------|
| pos_error | 1 | Mean                             |             | .02023155  | .000437381 |
|           |   | 95% Confidence Interval for Mean | Lower Bound | .01937326  |            |
|           |   |                                  | Upper Bound | .02108984  |            |
|           |   | 5% Trimmed Mean                  |             | .01980528  |            |
|           |   | Median                           |             | .01974753  |            |
|           |   | Variance                         |             | .000       |            |
|           |   | Std. Deviation                   |             | .013831208 |            |
|           |   | Minimum                          |             | .000015    |            |
|           |   | Maximum                          |             | .055072    |            |
|           |   | Range                            |             | .055057    |            |
|           |   | Interquartile Range              |             | .023795    |            |
|           |   | Skewness                         |             | .274       | .077       |
|           |   | Kurtosis                         |             | -.980      | .155       |
|           | 2 | Mean                             |             | .04452890  | .000851956 |
|           |   | 95% Confidence Interval for Mean | Lower Bound | .04285707  |            |
|           |   |                                  | Upper Bound | .04620073  |            |
|           |   | 5% Trimmed Mean                  |             | .04426627  |            |
|           |   | Median                           |             | .04554429  |            |
|           |   | Variance                         |             | .001       |            |
|           |   | Std. Deviation                   |             | .026941200 |            |
|           |   | Minimum                          |             | .000081    |            |
|           |   | Maximum                          |             | .093891    |            |
|           |   | Range                            |             | .093810    |            |
|           |   | Interquartile Range              |             | .049695    |            |
|           |   | Skewness                         |             | -.021      | .077       |

## Descriptives

| seq_number |                                  | Statistic   | Std. Error |
|------------|----------------------------------|-------------|------------|
| 3          | Kurtosis                         | -1.318      | .155       |
|            | Mean                             | .02153194   | .000261484 |
|            | 95% Confidence Interval for Mean | Lower Bound | .02101882  |
|            |                                  | Upper Bound | .02204506  |
|            | 5% Trimmed Mean                  | .02162649   |            |
|            | Median                           | .02106640   |            |
|            | Variance                         | .000        |            |
|            | Std. Deviation                   | .008268840  |            |
|            | Minimum                          | .000006     |            |
|            | Maximum                          | .042561     |            |
|            | Range                            | .042555     |            |
|            | Interquartile Range              | .011023     |            |
|            | Skewness                         | -.055       | .077       |
|            | Kurtosis                         | -.428       | .155       |
| 4          | Mean                             | .01870866   | .000224869 |
|            | 95% Confidence Interval for Mean | Lower Bound | .01826739  |
|            |                                  | Upper Bound | .01914993  |
|            | 5% Trimmed Mean                  | .01890004   |            |
|            | Median                           | .01964182   |            |
|            | Variance                         | .000        |            |
|            | Std. Deviation                   | .007110995  |            |
|            | Minimum                          | .000147     |            |
|            | Maximum                          | .036476     |            |
|            | Range                            | .036329     |            |
|            | Interquartile Range              | .008585     |            |
|            | Skewness                         | -.562       | .077       |
|            | Kurtosis                         | -.049       | .155       |
| 5          | Mean                             | .05082912   | .000493713 |
|            | 95% Confidence Interval for Mean | Lower Bound | .04986028  |
|            |                                  | Upper Bound | .05179795  |
|            | 5% Trimmed Mean                  | .05141702   |            |
|            | Median                           | .05169586   |            |
|            | Variance                         | .000        |            |
|            | Std. Deviation                   | .015612566  |            |
|            | Minimum                          | .002893     |            |

## Descriptives

| seq_number |                     | Statistic | Std. Error |
|------------|---------------------|-----------|------------|
|            | Maximum             | .082372   |            |
|            | Range               | .079479   |            |
|            | Interquartile Range | .021011   |            |
|            | Skewness            | -.496     | .077       |
|            | Kurtosis            | .293      | .155       |

## Tests of Normality

|           |            | Kolmogorov-Smirnov <sup>a</sup> |      |      | Shapiro-Wilk |      |      |
|-----------|------------|---------------------------------|------|------|--------------|------|------|
|           | seq_number | Statistic                       | df   | Sig. | Statistic    | df   | Sig. |
| pos_error | 1          | .091                            | 1000 | .000 | .950         | 1000 | .000 |
|           | 2          | .105                            | 1000 | .000 | .937         | 1000 | .000 |
|           | 3          | .036                            | 1000 | .005 | .992         | 1000 | .000 |
|           | 4          | .120                            | 1000 | .000 | .961         | 1000 | .000 |
|           | 5          | .037                            | 1000 | .003 | .979         | 1000 | .000 |

a. Lilliefors Significance Correction

\*Nonparametric Tests: Independent Samples.

NPTESTS

/INDEPENDENT TEST (error\_mm) GROUP (seq\_number) KRUSKAL\_WALLIS (COMPARE=PAIRWISE)

/MISSING SCOPE=ANALYSIS USERMISSING=EXCLUDE

/CRITERIA ALPHA=0.05 CILEVEL=95.

## OneHand

### Notes

|                |                                |                                                                                                                                                                                                      |
|----------------|--------------------------------|------------------------------------------------------------------------------------------------------------------------------------------------------------------------------------------------------|
| Output Created |                                | 29-MAR-2021 16:05:09                                                                                                                                                                                 |
| Comments       |                                |                                                                                                                                                                                                      |
| Input          | Data                           | C:\Data\SubmittedPapers\DennisPaper\PilotData\OneHand.sav                                                                                                                                            |
|                | Active Dataset                 | DataSet4                                                                                                                                                                                             |
|                | Filter                         | <none>                                                                                                                                                                                               |
|                | Weight                         | <none>                                                                                                                                                                                               |
|                | Split File                     | <none>                                                                                                                                                                                               |
|                | N of Rows in Working Data File | 5000                                                                                                                                                                                                 |
| Syntax         |                                | NPTESTS<br>/INDEPENDENT TEST<br>(error_mm) GROUP<br>(seq_number)<br>KRUSKAL_WALLIS<br>(COMPARE=PAIRWISE)<br>/MISSING<br>SCOPE=ANALYSIS<br>USERMISSING=EXCLUDE<br>/CRITERIA ALPHA=0.05<br>CILEVEL=95. |
| Resources      | Processor Time                 | 00:00:00,25                                                                                                                                                                                          |
|                | Elapsed Time                   | 00:00:00,21                                                                                                                                                                                          |

### Hypothesis Test Summary

|   | Null Hypothesis                                                           | Test                                    | Sig. | Decision                    |
|---|---------------------------------------------------------------------------|-----------------------------------------|------|-----------------------------|
| 1 | The distribution of error_mm is the same across categories of seq_number. | Independent-Samples Kruskal-Wallis Test | .000 | Reject the null hypothesis. |

Asymptotic significances are displayed. The significance level is .05.

\* Chart Builder.

GGRAPH

```

/GRAPHDATASET NAME="graphdataset" VARIABLES=seq_number error_mm MISSING=LIST
WISE REPORTMISSING=NO
/GRAPHSPEC SOURCE=INLINE.
BEGIN GPL
SOURCE: s=userSource(id("graphdataset"))
DATA: seq_number=col(source(s), name("seq_number"), unit.category())
DATA: error_mm=col(source(s), name("error_mm"))
DATA: id=col(source(s), name("$CASENUM"), unit.category())
GUIDE: axis(dim(1), label("seq_number"))
GUIDE: axis(dim(2), label("error_mm"))
GUIDE: text.title(label("Simple Boxplot of error_mm by seq_number"))
SCALE: linear(dim(2), include(0))
ELEMENT: schema(position(bin.quantile.letter*seq_number*error_mm), label(id
))
END GPL.

```

## GGraph

### Notes

|                |                                   |                                                                       |
|----------------|-----------------------------------|-----------------------------------------------------------------------|
| Output Created |                                   | 29-MAR-2021 16:05:45                                                  |
| Comments       |                                   |                                                                       |
| Input          | Data                              | C:<br>\Data\SubmittedPapers\De<br>nnisPaper\PilotData\TwoH<br>and.sav |
|                | Active Dataset                    | DataSet5                                                              |
|                | Filter                            | <none>                                                                |
|                | Weight                            | <none>                                                                |
|                | Split File                        | <none>                                                                |
|                | N of Rows in Working Data<br>File | 5000                                                                  |

## Notes

|           |                                                                                                                                                                                                                                                                                                                                                                                                                                                                                                                                                                                                                                                                                                                                                                                                            |             |
|-----------|------------------------------------------------------------------------------------------------------------------------------------------------------------------------------------------------------------------------------------------------------------------------------------------------------------------------------------------------------------------------------------------------------------------------------------------------------------------------------------------------------------------------------------------------------------------------------------------------------------------------------------------------------------------------------------------------------------------------------------------------------------------------------------------------------------|-------------|
| Syntax    | <pre> GGRAPH   /GRAPHDATASET   NAME="graphdataset"   VARIABLES=seq_number   error_mm   MISSING=LISTWISE   REPORTMISSING=NO   /GRAPHSPEC   SOURCE=INLINE.   BEGIN GPL     SOURCE: s=userSource     (id("graphdataset"))     DATA: seq_number=col     (source(s), name     ("seq_number"), unit.     category())     DATA: error_mm=col     (source(s), name     ("error_mm"))     DATA: id=col(source(s),     name("\$CASENUM"), unit.     category())     GUIDE: axis(dim(1), label     ("seq_number"))     GUIDE: axis(dim(2), label     ("error_mm"))     GUIDE: text.title(label     ("Simple Boxplot of     error_mm by     seq_number"))     SCALE: linear(dim(2),     include(0))     ELEMENT: schema     (position(bin.quantile.letter     (seq_number*error_mm)),     label(id))   END GPL. </pre> |             |
| Resources | Processor Time                                                                                                                                                                                                                                                                                                                                                                                                                                                                                                                                                                                                                                                                                                                                                                                             | 00:00:00,42 |
|           | Elapsed Time                                                                                                                                                                                                                                                                                                                                                                                                                                                                                                                                                                                                                                                                                                                                                                                               | 00:00:00,28 |



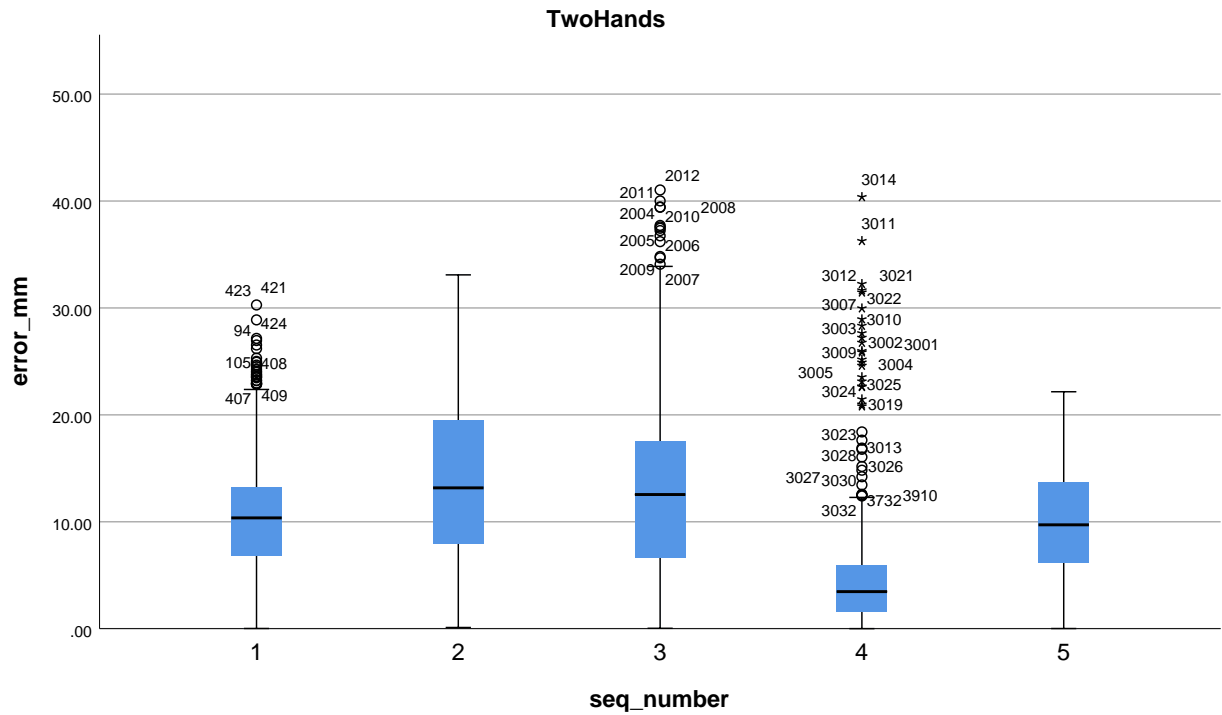

```

EXAMINE VARIABLES=error_mm BY seq_number
/PLOT BOXPLOT NPLOT
/COMPARE GROUPS
/STATISTICS DESCRIPTIVES
/CINTERVAL 95
/MISSING LISTWISE
/NOTOTAL.

```

## Explore

## Notes

|                        |                                |                                                                                                                                                                              |
|------------------------|--------------------------------|------------------------------------------------------------------------------------------------------------------------------------------------------------------------------|
| Output Created         |                                | 29-MAR-2021 16:06:24                                                                                                                                                         |
| Comments               |                                |                                                                                                                                                                              |
| Input                  | Data                           | C:<br>\Data\SubmittedPapers\De<br>nnisPaper\PilotData\TwoH<br>and.sav                                                                                                        |
|                        | Active Dataset                 | DataSet5                                                                                                                                                                     |
|                        | Filter                         | <none>                                                                                                                                                                       |
|                        | Weight                         | <none>                                                                                                                                                                       |
|                        | Split File                     | <none>                                                                                                                                                                       |
|                        | N of Rows in Working Data File | 5000                                                                                                                                                                         |
| Missing Value Handling | Definition of Missing          | User-defined missing values for dependent variables are treated as missing.                                                                                                  |
|                        | Cases Used                     | Statistics are based on cases with no missing values for any dependent variable or factor used.                                                                              |
| Syntax                 |                                | EXAMINE<br>VARIABLES=error_mm<br>BY seq_number<br>/PLOT BOXPLOT<br>NPLOT<br>/COMPARE GROUPS<br>/STATISTICS<br>DESCRIPTIVES<br>/INTERVAL 95<br>/MISSING LISTWISE<br>/NOTOTAL. |
| Resources              | Processor Time                 | 00:00:02,05                                                                                                                                                                  |
|                        | Elapsed Time                   | 00:00:01,78                                                                                                                                                                  |

## TwoHands

## Case Processing Summary

|          |            | Valid |         | Cases Missing |         | Total |         |
|----------|------------|-------|---------|---------------|---------|-------|---------|
|          | seq_number | N     | Percent | N             | Percent | N     | Percent |
| error_mm | 1          | 1000  | 100.0%  | 0             | 0.0%    | 1000  | 100.0%  |
|          | 2          | 1000  | 100.0%  | 0             | 0.0%    | 1000  | 100.0%  |
|          | 3          | 1000  | 100.0%  | 0             | 0.0%    | 1000  | 100.0%  |
|          | 4          | 1000  | 100.0%  | 0             | 0.0%    | 1000  | 100.0%  |
|          | 5          | 1000  | 100.0%  | 0             | 0.0%    | 1000  | 100.0%  |

## Descriptives

|          |   | seq_number                       | Statistic   |         | Std. Error |
|----------|---|----------------------------------|-------------|---------|------------|
| error_mm | 1 | Mean                             |             | 10.3645 | .15651     |
|          |   | 95% Confidence Interval for Mean | Lower Bound | 10.0573 |            |
|          |   |                                  | Upper Bound | 10.6716 |            |
|          |   | 5% Trimmed Mean                  |             | 10.1817 |            |
|          |   | Median                           |             | 10.3619 |            |
|          |   | Variance                         |             | 24.495  |            |
|          |   | Std. Deviation                   |             | 4.94923 |            |
|          |   | Minimum                          |             | .02     |            |
|          |   | Maximum                          |             | 30.28   |            |
|          |   | Range                            |             | 30.26   |            |
|          |   | Interquartile Range              |             | 6.41    |            |
|          |   | Skewness                         |             | .528    | .077       |
|          |   | Kurtosis                         |             | .754    | .155       |
|          | 2 | Mean                             |             | 13.6855 | .21874     |
|          |   | 95% Confidence Interval for Mean | Lower Bound | 13.2562 |            |
|          |   |                                  | Upper Bound | 14.1147 |            |
|          |   | 5% Trimmed Mean                  |             | 13.6862 |            |
|          |   | Median                           |             | 13.1695 |            |
|          |   | Variance                         |             | 47.845  |            |
|          |   | Std. Deviation                   |             | 6.91701 |            |
|          |   | Minimum                          |             | .11     |            |
|          |   | Maximum                          |             | 33.09   |            |
|          |   | Range                            |             | 32.98   |            |
|          |   | Interquartile Range              |             | 11.56   |            |
|          |   | Skewness                         |             | .022    | .077       |

## Descriptives

| seq_number |                                  | Statistic   | Std. Error |
|------------|----------------------------------|-------------|------------|
| 3          | Kurtosis                         | -.971       | .155       |
|            | Mean                             | 12.4482     | .23598     |
|            | 95% Confidence Interval for Mean | Lower Bound | 11.9851    |
|            |                                  | Upper Bound | 12.9112    |
|            | 5% Trimmed Mean                  | 12.1474     |            |
|            | Median                           | 12.5471     |            |
|            | Variance                         | 55.687      |            |
|            | Std. Deviation                   | 7.46234     |            |
|            | Minimum                          | .04         |            |
|            | Maximum                          | 41.03       |            |
|            | Range                            | 41.00       |            |
|            | Interquartile Range              | 10.95       |            |
|            | Skewness                         | .482        | .077       |
|            | Kurtosis                         | .448        | .155       |
| 4          | Mean                             | 4.4616      | .14571     |
|            | 95% Confidence Interval for Mean | Lower Bound | 4.1756     |
|            |                                  | Upper Bound | 4.7475     |
|            | 5% Trimmed Mean                  | 3.8682      |            |
|            | Median                           | 3.4662      |            |
|            | Variance                         | 21.231      |            |
|            | Std. Deviation                   | 4.60776     |            |
|            | Minimum                          | .00         |            |
|            | Maximum                          | 40.37       |            |
|            | Range                            | 40.37       |            |
|            | Interquartile Range              | 4.31        |            |
|            | Skewness                         | 3.261       | .077       |
|            | Kurtosis                         | 15.369      | .155       |
| 5          | Mean                             | 9.9044      | .15980     |
|            | 95% Confidence Interval for Mean | Lower Bound | 9.5908     |
|            |                                  | Upper Bound | 10.2180    |
|            | 5% Trimmed Mean                  | 9.8858      |            |
|            | Median                           | 9.7138      |            |
|            | Variance                         | 25.535      |            |
|            | Std. Deviation                   | 5.05324     |            |
|            | Minimum                          | .01         |            |

## Descriptives

| seq_number |                     | Statistic | Std. Error |
|------------|---------------------|-----------|------------|
|            | Maximum             | 22.16     |            |
|            | Range               | 22.15     |            |
|            | Interquartile Range | 7.56      |            |
|            | Skewness            | .035      | .077       |
|            | Kurtosis            | -.786     | .155       |

## Tests of Normality

|          |            | Kolmogorov-Smirnov <sup>a</sup> |      |      | Shapiro-Wilk |      |      |
|----------|------------|---------------------------------|------|------|--------------|------|------|
|          | seq_number | Statistic                       | df   | Sig. | Statistic    | df   | Sig. |
| error_mm | 1          | .041                            | 1000 | .000 | .979         | 1000 | .000 |
|          | 2          | .070                            | 1000 | .000 | .974         | 1000 | .000 |
|          | 3          | .048                            | 1000 | .000 | .968         | 1000 | .000 |
|          | 4          | .167                            | 1000 | .000 | .709         | 1000 | .000 |
|          | 5          | .039                            | 1000 | .001 | .985         | 1000 | .000 |

a. Lilliefors Significance Correction

\*Nonparametric Tests: Independent Samples.

NPTESTS

/INDEPENDENT TEST (error\_mm) GROUP (seq\_number) KRUSKAL\_WALLIS (COMPARE=PAIRWISE)

/MISSING SCOPE=ANALYSIS USERMISSING=EXCLUDE

/CRITERIA ALPHA=0.05 CILEVEL=95.

## TwoHands

### Notes

|                |                                |                                                                                                                                                                                                      |
|----------------|--------------------------------|------------------------------------------------------------------------------------------------------------------------------------------------------------------------------------------------------|
| Output Created |                                | 29-MAR-2021 16:07:15                                                                                                                                                                                 |
| Comments       |                                |                                                                                                                                                                                                      |
| Input          | Data                           | C:\Data\SubmittedPapers\DennisPaper\PilotData\TwoHand.sav                                                                                                                                            |
|                | Active Dataset                 | DataSet5                                                                                                                                                                                             |
|                | Filter                         | <none>                                                                                                                                                                                               |
|                | Weight                         | <none>                                                                                                                                                                                               |
|                | Split File                     | <none>                                                                                                                                                                                               |
|                | N of Rows in Working Data File | 5000                                                                                                                                                                                                 |
| Syntax         |                                | NPTESTS<br>/INDEPENDENT TEST<br>(error_mm) GROUP<br>(seq_number)<br>KRUSKAL_WALLIS<br>(COMPARE=PAIRWISE)<br>/MISSING<br>SCOPE=ANALYSIS<br>USERMISSING=EXCLUDE<br>/CRITERIA ALPHA=0.05<br>CILEVEL=95. |
| Resources      | Processor Time                 | 00:00:00,31                                                                                                                                                                                          |
|                | Elapsed Time                   | 00:00:00,27                                                                                                                                                                                          |

### Hypothesis Test Summary

|   | Null Hypothesis                                                           | Test                                    | Sig. | Decision                    |
|---|---------------------------------------------------------------------------|-----------------------------------------|------|-----------------------------|
| 1 | The distribution of error_mm is the same across categories of seq_number. | Independent-Samples Kruskal-Wallis Test | .000 | Reject the null hypothesis. |

Asymptotic significances are displayed. The significance level is .05.
